# Supplementary material
Source: publisher figshare collection journal article supplement (https://diabetesjournals.figshare.com/ndownloader/files/26113595)
Supplement: Supplementary file 1 [file 26113595]

## Sheet: Supplementary Table 1
Supplementary Table 1: Association results for SNPs from DIAMANTE European GWAS (Mahajan et al., 2018, Ref 20)
Gene	Variant	Chromosome	Position	Risk allele	Other allele	Risk Allele Frequency	Minor Allele Frequency	P value	Odds Ratio (OR)	Model	OR_Minor_Allele	Position	Direction	TODAY_SEARCH_vs_T2D_control	Effect_Allele	Non-effect_Allele	Effect allele frequency	Beta	StdErr	P-value	Direction	TODAY_SEARCH_case_vs_youth_control	Effect_Allele	Non-effect_Allele	Effect allele frequency	Beta	StdErr	P-value	Direction
MACF1	rs3768321	1	40035928	T	G	20	20	2.6x10-26	1.09	BMI unadjusted	1.09	40035928	1		t	g	0.1275	0.0044	0.0112	0.6958	++-		t	g	0.1545	0.0146	0.0208	0.4833	++
FAF1	rs58432198	1	51256091	C	T	88.1	11.9	2.1x10-10	1.07	BMI unadjusted	0.934579	51256091	1
PATJ	rs12140153	1	62579891	G	T	90.5	9.49	1.3x10-8	1.07	BMI unadjusted	0.934579	62579891	1		t	g	0.0423	-0.0105	0.0198	0.5966	++-		t	g	0.0584	0.0021	0.0328	0.9479	-+
DENND2C	rs184660829	1	115144899	C	T	0.02	0.02	2.5x10-8	8.05	BMI unadjusted	8.05	115144899	1
PTGFRN	rs1127215	1	117532790	C	T	58.4	41.6	1.6x10-13	1.05	BMI unadjusted	0.952381	117532790	1		t	c	0.5328	-0.0255	0.0067	0.0001533	---		t	c	0.3585	-0.0147	0.0119	0.2149	--
NOTCH2	rs1493694	1	120526982	T	C	10.9	10.9	2.7x10-16	1.09	BMI unadjusted	1.09	120526982	1		t	c	0.2566	0.0146	0.0092	0.1108	+++		t	c	0.4581	0.0057	0.0127	0.6514	+-
FAM63A	rs10305745	1	150786038	A	G	1.45	1.45	4.4x10-6	1.28	BMI unadjusted	1.28	150786038	1
FAM63A	rs145904381	1	151017991	T	C	98.7	1.33	2.6x10-8	1.19	BMI unadjusted	0.840336	151017991	1
SEC16B	rs539515	1	177889025	C	A	19.8	19.8	1.6x10-10	1.05	BMI unadjusted	1.05	177889025	1		a	c	0.7742	-0.0283	0.0075	0.0001702	---		a	c	0.7344	-0.0509	0.0129	7.98e-05	--
DSTYK	rs12048743	1	205114873	G	C	44.2	44.2	3.5x10-9	1.04	BMI unadjusted	1.04	205114873	1		c	g	0.4105	-0.0078	0.0071	0.2684	+--		c	g	0.5303	-0.0016	0.0114	0.891	--
SRGAP2	rs9430095	1	206593900	C	G	49.4	49.4	1.9x10-8	1.04	BMI unadjusted	1.04	206593900	1		c	g	0.5674	0.0169	0.0066	0.01074	+++		c	g	0.6811	-0.0019	0.0138	0.8895	-+
PROX1	rs79687284	1	214150821	C	G	3.48	3.48	2.6x10-16	1.16	BMI unadjusted	1.16	214150821	1
PROX1	rs340874	1	214159256	C	T	55.6	44.5	1.6x10-22	1.07	BMI unadjusted	0.934579	214159256	1		t	c	0.5933	-0.0102	0.0067	0.127	---		t	c	0.649	0.0026	0.0133	0.8455	-+
PROX1	rs114526150	1	214175531	G	T	2.25	2.25	4.2x10-7	1.12	BMI unadjusted	1.12	214175531	1		t	g	0.9898	0.0582	0.036	0.1065	+++		t	g	0.9913	-0.0327	0.0765	0.6697	-+
LYPLAL1	rs553014999	1	219584164	C	T	0.13	0.13	7.7x10-6	1.9	BMI unadjusted	1.9	219584164	1
LYPLAL1	rs2820446	1	219748818	C	G	70.6	29.5	3.3x10-16	1.06	BMI unadjusted	0.943396	219748818	1		c	g	0.5617	0.038	0.0073	1.75e-07	+++		c	g	0.8059	0.0202	0.0178	0.2559	++
ABCB10	rs348330	1	229672955	G	A	36.1	36.1	2.7x10-14	1.05	BMI unadjusted	1.05	229672955	1		a	g	0.4253	-0.0138	0.0067	0.03969	---		a	g	0.3664	0.0091	0.0136	0.5011	+-
GNG4	rs291367	1	235690800	G	A	63.2	36.8	4.7x10-10	1.04	BMI unadjusted	0.961538	235690800	1		a	g	0.3213	0.0036	0.007	0.6077	--+		a	g	0.3337	0.0071	0.0122	0.5573	+-
TMEM18	rs62107261	2	422144	T	C	95.4	4.64	3.8x10-12	1.12	BMI unadjusted	0.892857	422144	1
TMEM18	rs35913461	2	653575	C	T	82.9	17.1	1.6x10-11	1.06	BMI unadjusted	0.943396	653575	1		t	c	0.1479	-0.0406	0.0095	1.84e-05	-+-		t	c	0.1821	-0.0347	0.0149	0.0204	--
FAM49A	rs11680058	2	16574669	A	G	86.3	13.7	1.4x10-8	1.06	BMI unadjusted	0.943396	16574669	1
DTNB	rs17802463	2	25643221	G	T	73.1	26.9	2.9x10-8	1.04	BMI unadjusted	0.961538	25643221	1		t	g	0.189	-0.0039	0.0087	0.6563	+--		t	g	0.2007	0.0097	0.0168	0.563	++
GCKR	rs1260326	2	27730940	C	T	60.7	39.3	6.5x10-25	1.07	BMI unadjusted	0.934579	27730940	1		t	c	0.3285	-0.0273	0.0072	0.0001482	---		t	c	0.2671	-0.0041	0.0148	0.779	+-
THADA	rs28525376	2	43207872	G	T	42.2	42.2	2.7x10-6	1.03	BMI unadjusted	1.03	43207872	1		t	g	0.5241	-0.0058	0.0067	0.3815	-+-		t	g	0.6789	-0.0002	0.012	0.9899	-+
THADA	rs6708643	2	43430440	A	G	50.1	49.9	3.9x10-8	1.04	BMI unadjusted	0.961538	43430440	1		a	g	0.6441	0.0159	0.0067	0.01746	+++		a	g	0.603	0.0236	0.0114	0.03933	++
THADA	rs80147536	2	43698028	A	T	90.4	9.57	2.7x10-29	1.13	BMI unadjusted	0.884956	43698028	1		a	t	0.9403	0.0192	0.0151	0.2045	+++		a	t	0.9314	0.0239	0.0236	0.3111	+-
BNIPL	rs10193538	2	58981064	T	G	61	39	8.9x10-9	1.04	BMI unadjusted	0.961538	58981064	1		t	g	0.5413	0.0169	0.0065	0.009046	+++		t	g	0.6034	0.0232	0.0114	0.04152	++
BNIPL	rs6545714	2	59307725	G	A	39.2	39.2	8.9x10-9	1.04	BMI unadjusted	1.04	59307725	1		a	g	0.6615	-0.0075	0.0067	0.2654	+--		a	g	0.6547	0.0062	0.012	0.6077	-+
BCL11A	rs243024	2	60583665	A	G	46	46	2.5x10-20	1.06	BMI unadjusted	1.06	60583665	1		a	g	0.519	0.0073	0.0064	0.2531	+++		a	g	0.401	0.0036	0.0116	0.7562	+-
CEP68	rs2249105	2	65287896	A	G	63.4	36.6	2.2x10-14	1.1	BMI unadjusted	0.909091	65287896	1
CEP68	rs2052261	2	65355270	G	A	30.4	30.4	2.5x10-6	1.07	BMI unadjusted	1.07	65355270	1		a	g	0.7295	0.0011	0.0073	0.8854	++-		a	g	0.7519	0.0381	0.0132	0.00381	++
CEP68	rs2028150	2	65655012	C	G	59.8	40.2	2.3x10-12	1.05	BMI unadjusted	0.952381	65655012	1		c	g	0.5975	0.019	0.007	0.006435	+-+		c	g	0.3826	0.0101	0.0128	0.4325	+-
TMEM127	rs79046683	2	96913918	T	G	0.48	0.48	3.0x10-8	2.34	BMI adjusted	2.34	96913918	1
DDX18	rs562386202	2	118071061	G	A	0.06	0.06	4.2x10-8	3.2	BMI unadjusted	3.2	118071061	1
GLI2	rs11688931	2	121318166	C	G	84.9	15.1	8.2x10-6	1.04	BMI unadjusted	0.961538	121318166	1		c	g	0.8907	-0.004	0.0109	0.7156	--+		c	g	0.8484	0.0205	0.0156	0.189	++
GLI2	rs11688682	2	121347612	G	C	72.8	27.2	4.2x10-9	1.05	BMI unadjusted	0.952381	121347612	1
GLI2	rs66477705	2	121378852	T	C	96.7	3.3	2.6x10-6	1.09	BMI unadjusted	0.917431	121378852	1		t	c	0.9633	0.0071	0.0194	0.7142	-++		t	c	0.9421	0.0113	0.0252	0.6548	-+
PABPC1P2	rs35999103	2	147861633	T	C	15.5	15.5	9.7x10-9	1.05	BMI unadjusted	1.05	147861633	1		t	c	0.3036	0.0042	0.0078	0.5893	+++		t	c	0.1204	0.0077	0.0177	0.663	+-
CYTIP	rs13426680	2	158339550	A	G	93.7	6.27	6.7x10-10	1.09	BMI unadjusted	0.917431	158339550	1		a	g	0.7594	0.0089	0.0087	0.3093	+++		a	g	0.589	0.0074	0.0134	0.5822	++
RBMS1	rs3772071	2	161135544	T	C	71.4	28.7	1.2x10-11	1.05	BMI unadjusted	0.952381	161135544	1		t	c	0.7284	0.0011	0.0077	0.8915	+-+		t	c	0.6129	0.0153	0.0118	0.1944	++
GRB14/COBLL1	rs10195252	2	165513091	T	C	58.6	41.4	6.0x10-25	1.07	BMI unadjusted	0.934579	165513091	1		t	c	0.6453	0.0355	0.0078	4.63e-06	+++		t	c	0.4266	0.0346	0.0123	0.004752	++
GRB14/COBLL1	rs13024606	2	165573194	T	C	4.72	4.72	1.7x10-8	1.09	BMI unadjusted	1.09	165573194	1		t	c	0.0254	0.0151	0.0231	0.5129	+-+		t	c	0.03	-0.0241	0.0444	0.5871	+-
CRYBA2	rs113414093	2	219859171	A	G	5.14	5.14	6.6x10-9	1.12	BMI adjusted	1.12	219859171	1
IRS1	rs2972144	2	227101411	G	A	63.9	36.2	2.1x10-46	1.1	BMI unadjusted	0.909091	227101411	1		a	g	0.2348	-0.022	0.0082	0.00707	---		a	g	0.2817	-0.0303	0.0126	0.01624	--
PPARG	rs11709077	3	12336507	G	A	87.7	12.4	1.8x10-36	1.14	BMI unadjusted	0.877193	12336507	1		a	g	0.1069	-0.0423	0.0109	9.75e-05	---		a	g	0.0788	-0.0093	0.0267	0.729	+-
PPARG	rs17819328	3	12489342	G	T	42.5	42.5	4.8x10-16	1.06	BMI unadjusted	1.06	12489342	1		t	g	0.6129	-0.0041	0.0067	0.5403	-+-		t	g	0.7049	0.001	0.013	0.941	-+
UBE2E2	rs35352848	3	23455582	T	C	78.8	21.2	1.3x10-17	1.07	BMI unadjusted	0.934579	23455582	1		t	c	0.7871	0.0168	0.009	0.06121	+++		t	c	0.6894	0.0002	0.0126	0.9842	+-
UBE2E2	rs17013314	3	23510044	G	A	3.13	3.13	8.4x10-9	1.11	BMI unadjusted	1.11	23510044	1		a	g	0.9238	-0.0431	0.015	0.00402	---		a	g	0.9739	-0.0291	0.0452	0.5193	--
KIF9	rs11926707	3	46925539	C	T	62.6	37.4	2.1x10-8	1.27	BMI unadjusted	0.787402	46925539	1		t	c	0.376	0.0032	0.0075	0.6665	-+-		t	c	0.5958	0.008	0.0124	0.5225	-+
KIF9	rs75423501	3	47242923	G	A	10.1	10.1	7.5x10-6	1.05	BMI unadjusted	1.05	47242923	1
RBM6	rs4688760	3	49980596	T	C	68.4	31.6	3.5x10-10	1.04	BMI unadjusted	0.961538	49980596	1		t	c	0.5096	0.0065	0.0077	0.4016	+-+		t	c	0.7633	0.0003	0.0141	0.9815	-+
RFT1	rs2581787	3	53127677	T	G	56.3	43.7	2.4x10-8	1.04	BMI unadjusted	0.961538	53127677	1		t	g	0.5662	0.0114	0.0071	0.1058	+-+		t	g	0.3551	-0.0143	0.0137	0.2966	--
CACNA2D3	rs76263492	3	54828827	T	G	4.52	4.52	6.3x10-9	1.09	BMI unadjusted	1.09	54828827	1		t	g	0.0136	0.0023	0.0291	0.9373	--+		t	g	0.0171	-0.1622	0.0603	0.007136	--
PSMD6	rs3774723	3	63962339	G	A	84.4	15.6	1.6x10-13	1.07	BMI unadjusted	0.934579	63962339	1		a	g	0.2378	-0.0037	0.0091	0.6853	--+		a	g	0.3846	0.0033	0.0123	0.7894	-+
PSMD6	rs74368513	3	64460694	G	A	99.6	0.44	7.0x10-6	1.31	BMI unadjusted	0.763359	64460694	1
ADAMTS9	rs9860730	3	64701146	A	G	70.4	29.6	4.9x10-15	1.06	BMI unadjusted	0.943396	64701146	1		a	g	0.3849	0.0165	0.0077	0.03268	--+		a	g	0.4028	0.0136	0.0135	0.3145	+-
SHQ1	rs13085136	3	72865183	C	T	92.8	7.17	1.5x10-8	1.08	BMI unadjusted	0.925926	72865183	1
ROBO2	rs2272163	3	77671721	C	A	61.8	38.2	9.6x10-9	1.04	BMI unadjusted	0.961538	77671721	1		a	c	0.3935	-0.0195	0.0065	0.002623	---		a	c	0.3612	-0.0126	0.0117	0.2852	--
ADCY5	rs11708067	3	123065778	A	G	77.2	22.8	5.2x10-32	1.09	BMI unadjusted	0.917431	123065778	1		a	g	0.7143	0.0205	0.0074	0.00555	+++		a	g	0.8315	0.0195	0.0152	0.198	++
SLC12A8	rs649961	3	124926637	T	C	46.5	46.5	9.9x10-10	1.04	BMI unadjusted	1.04	124926637	1		t	c	0.336	0.0049	0.0071	0.4916	+-+		t	c	0.301	0.0338	0.0155	0.02898	++
TMCC1	rs9828772	3	129333182	C	G	89.8	10.2	4.2x10-8	1.06	BMI unadjusted	0.943396	129333182	1		c	g	0.9137	0.0238	0.012	0.04663	+++		c	g	0.8933	0.0089	0.0185	0.6324	-+
TMCC1	rs559138871	3	129470067	T	C	0.2	0.2	7.3x10-6	1.49	BMI unadjusted	1.49	129470067	1
TSC22D2	rs62271373	3	150066540	A	T	5.53	5.53	1.0x10-9	1.09	BMI unadjusted	1.09	150066540	1		a	t	0.0389	0.0083	0.0189	0.662	--+		a	t	0.0414	0.0027	0.0385	0.9442	-+
MBNL1	rs13065698	3	152086533	A	G	60	40	8.1x10-13	1.05	BMI unadjusted	0.952381	152086533	1		a	g	0.5841	0.0032	0.0065	0.6162	-++		a	g	0.5635	0.0006	0.0113	0.9571	-+
MBNL1	rs74653713	3	152417881	C	A	95.7	4.29	1.2x10-8	1.1	BMI unadjusted	0.909091	152417881	1		a	c	0.0263	-0.0564	0.0253	0.02587	-+-		a	c	0.0277	-0.0364	0.0452	0.4198	-+
MBNL1	rs35497231	3	152433628	C	T	31.7	31.7	7.6x10-8	1.04	BMI unadjusted	1.04	152433628	1		t	c	0.6576	-0.0149	0.0072	0.03832	---		t	c	0.5	0.015	0.0116	0.1968	-+
EGFEM1P	rs7629630	3	168218841	A	T	85.7	14.3	2.5x10-8	1.05	BMI unadjusted	0.952381	168218841	1		a	t	0.7812	-0.0053	0.0096	0.5854	+-+		a	t	0.6587	-0.0181	0.0126	0.1508	--
SLC2A2	rs9873618	3	170733076	G	A	71	29	4.8x10-21	1.07	BMI unadjusted	0.934579	170733076	1		a	g	0.3308	0.011	0.007	0.1178	+++		a	g	0.4662	0.0093	0.0117	0.4242	++
ABCC5	rs2872246	3	183738460	A	C	45.4	45.4	1.5x10-8	1.04	BMI unadjusted	1.04	183738460	1		a	c	0.4436	-0.006	0.0066	0.3647	---		a	c	0.3186	-0.0218	0.0128	0.08776	--
IGF2BP2	rs6780171	3	185503456	A	T	31.4	31.4	9.0x10-56	1.14	BMI unadjusted	1.14	185503456	1		a	t	0.3332	0.0391	0.0072	5.96e-08	+++		a	t	0.5118	0.019	0.0116	0.1022	++
IGF2BP2	rs150111048	3	185514421	G	A	23.9	23.9	2.7x10-7	1.12	BMI unadjusted	1.12	185514421	1		a	g	0.6674	-0.0393	0.0072	5.78e-08	---		a	g	0.4888	-0.0193	0.0117	0.09991	--
IGF2BP2	rs11717959	3	185541213	G	T	62.1	37.9	3.0x10-6	1.04	BMI unadjusted	0.961538	185541213	1		t	g	0.2613	0.0161	0.0078	0.04011	+++		t	g	0.3279	0.0185	0.0121	0.1272	++
IGF2BP2	rs1516728	3	185829891	A	T	75.9	24.1	6.3x10-6	1.03	BMI unadjusted	0.970874	185829891	1		a	t	0.5567	0.0147	0.0066	0.02448	+++		a	t	0.5728	0.013	0.0117	0.2644	-+
ST6GAL1	rs3887925	3	186665645	T	C	54.7	45.3	3.1x10-22	1.07	BMI unadjusted	0.934579	186665645	1
ST6GAL1	rs7645517	3	186675277	A	G	5.76	5.76	2.5x10-8	1.08	BMI unadjusted	1.08	186675277	1		a	g	0.1882	-0.0063	0.0109	0.566	+-+		a	g	0.2978	0.0056	0.0139	0.6862	-+
LPP	rs4686471	3	187740899	C	T	61	39	1.7x10-20	1.06	BMI unadjusted	0.943396	187740899	1		t	c	0.2556	-0.0077	0.008	0.3314	---		t	c	0.3264	-0.0121	0.0121	0.315	-+
PCGF3	rs111827885	4	616608	C	T	1.56	1.56	8.4x10-6	1.18	BMI unadjusted	1.18	616608	1
PCGF3	rs1531583	4	744972	T	G	4.58	4.58	3.5x10-14	1.13	BMI unadjusted	1.13	744972	1		t	g	0.1738	-0.0047	0.0134	0.7262	-++		t	g	0.2605	-0.025	0.015	0.0952	--
PCGF3	rs35654957	4	1010077	C	T	36.7	36.7	4.2x10-7	1.03	BMI unadjusted	1.03	1010077	1		t	c	0.7572	-0.0178	0.0081	0.02768	-+-		t	c	0.6971	-0.0175	0.0126	0.1637	-+
MAEA	rs56337234	4	1784403	C	T	50.3	49.7	8.6x10-18	1.06	BMI unadjusted	0.943396	1784403	1		t	c	0.5272	-0.0281	0.0065	1.41e-05	---		t	c	0.3524	-0.0265	0.0121	0.02874	--
HTT	rs362307	4	3241845	T	C	7.68	7.68	1.1x10-9	1.08	BMI unadjusted	1.08	3241845	1		t	c	0.1142	0.0221	0.011	0.04378	+++		t	c	0.0495	0.0826	0.0322	0.01039	++
WFS1	rs1801212	4	6302519	A	G	70.9	29.1	4.5x10-6	1.05	BMI unadjusted	0.952381	6302519	1
WFS1	rs10937721	4	6306763	C	G	58.8	41.2	1.5x10-8	1.06	BMI unadjusted	0.943396	6306763	1		c	g	0.7119	0.0281	0.0072	8.87e-05	+++		c	g	0.6783	0.0259	0.012	0.03141	++
LCORL	rs12640250	4	17792869	C	A	71.5	28.5	3.7x10-8	1.04	BMI unadjusted	0.961538	17792869	1		a	c	0.3419	-0.0084	0.0068	0.2115	---		a	c	0.2858	-0.0061	0.0125	0.6281	--
GNPDA2	rs10938398	4	45186139	A	G	42.9	42.9	3.6x10-12	1.05	BMI unadjusted	1.05	45186139	1		a	g	0.3558	0.0358	0.0068	1.17e-07	+++		a	g	0.3339	0.0382	0.0123	0.001861	++
USP46	rs2102278	4	52818664	G	A	31.9	31.9	3.7x10-8	1.04	BMI unadjusted	1.04	52818664	1		a	g	0.6269	-0.0034	0.0076	0.6559	++-		a	g	0.4095	0.0002	0.0135	0.9875	+-
USP46	rs114447556	4	53207093	T	C	8.39	8.39	8.4x10-6	1.06	BMI unadjusted	1.06	53207093	1
SCD5	rs12642790	4	83578271	A	G	33.8	33.8	4.4x10-10	1.04	BMI unadjusted	1.04	83578271	1		a	g	0.3021	0.0044	0.0076	0.5624	+-+		a	g	0.442	-0.0108	0.0116	0.3523	--
FAM13A	rs1903002	4	89740894	G	C	50.1	50	2.7x10-8	1.04	BMI unadjusted	0.961538	89740894	1		c	g	0.4744	-0.0129	0.0064	0.04386	-+-		c	g	0.3723	-0.0125	0.012	0.2949	--
FAM13A	rs576406049	4	89857291	T	C	0.13	0.13	1.6x10-6	1.65	BMI unadjusted	1.65	89857291	1
SMARCAD1	rs6821438	4	95091911	A	G	53.4	46.6	4.0x10-11	1.04	BMI unadjusted	0.961538	95091911	1		a	g	0.422	-0.0086	0.0073	0.2412	---		a	g	0.5555	-0.0103	0.0115	0.3692	--
SLC9B1	rs1580278	4	104140848	C	A	47.3	47.3	2.2x10-10	1.04	BMI unadjusted	1.04	104140848	1		a	c	0.538	0.0005	0.007	0.9446	-++		a	c	0.6539	0.0332	0.0145	0.02227	-+
PABPC4L	rs1296328	4	137083193	A	C	44.6	44.6	3.5x10-8	1.04	BMI unadjusted	1.04	137083193	1		a	c	0.5861	0.0032	0.007	0.649	+-+		a	c	0.6424	-0.0073	0.0142	0.6049	-+
TMEM154	rs7669833	4	153513369	T	A	70.5	29.6	1.2x10-14	1.06	BMI unadjusted	0.943396	153513369	1		a	t	0.3968	-0.0231	0.0065	0.0004021	---		a	t	0.3934	-0.0036	0.0117	0.7563	+-
PDGFC	rs28819812	4	157652753	C	A	67.7	32.3	2.2x10-8	1.04	BMI unadjusted	0.961538	157652753	1		a	c	0.358	-0.0213	0.0068	0.001758	+--		a	c	0.4063	-0.0073	0.0118	0.5382	-+
ACSL1	rs58730668	4	185717759	T	C	85.8	14.2	1.3x10-13	1.07	BMI unadjusted	0.934579	185717759	1		t	c	0.9138	0.0177	0.0119	0.1374	-++		t	c	0.9109	0.0219	0.0213	0.3048	-+
ANKH	rs3845281	5	14610134	G	A	90.4	9.61	2.3x10-11	1.08	BMI unadjusted	0.925926	14610134	1		a	g	0.0551	-0.0215	0.0151	0.1542	-+-		a	g	0.0618	0.0084	0.0234	0.7189	+-
ANKH	rs146886108	5	14751305	C	T	99.4	0.62	7.8x10-13	1.41	BMI unadjusted	0.70922	14751305	1
ANKH	rs17250977	5	14753745	G	A	3.76	3.76	2.0x10-11	1.12	BMI unadjusted	1.12	14753745	1
ANKH	rs6885132	5	14768092	C	G	90.4	9.6	1.7x10-8	1.07	BMI unadjusted	0.934579	14768092	1		c	g	0.8219	0.0171	0.0085	0.0438	+++		c	g	0.8327	0.0072	0.0156	0.647	+-
ANKH	rs76549217	5	14768766	T	C	2.95	2.95	3.0x10-10	1.14	BMI unadjusted	1.14	14768766	1
MRPS30	rs62368490	5	44534364	T	C	3.13	3.13	3.4x10-6	1.1	BMI unadjusted	1.1	44534364	1
MRPS30	rs6884702	5	44682589	G	A	39.3	39.3	1.5x10-10	1.04	BMI unadjusted	1.04	44682589	1		a	g	0.5776	-0.0074	0.0067	0.2703	---		a	g	0.6447	0.0024	0.0119	0.8376	++
ITGA1	rs17261179	5	51791225	T	C	51.7	48.3	1.3x10-8	1.04	BMI unadjusted	0.961538	51791225	1		t	c	0.6414	0.011	0.0072	0.1253	+++		t	c	0.6811	0.0101	0.0152	0.5071	+-
ITGA1	rs3811978	5	52100489	G	A	16.7	16.7	7.7x10-11	1.06	BMI unadjusted	1.06	52100489	1		a	g	0.7288	-0.0043	0.0075	0.567	++-		a	g	0.6337	-0.0094	0.0125	0.4538	--
ITGA1	rs62357230	5	52315682	A	G	3.39	3.39	5.9x10-6	1.09	BMI unadjusted	1.09	52315682	1		a	g	0.0176	-0.0095	0.0252	0.7072	+-+		a	g	0.0227	-0.0418	0.0379	0.2709	--
ARL15	rs62370480	5	52774510	A	G	22	22	2.0x10-6	1.04	BMI unadjusted	1.04	52774510	1		a	g	0.1375	0.0005	0.0107	0.9634	++-		a	g	0.1664	0.0014	0.0201	0.9445	-+
ARL15	rs702634	5	53271420	A	G	69	31	7.7x10-14	1.05	BMI unadjusted	0.952381	53271420	1
ARL15	rs279744	5	53412620	C	A	69.1	30.9	3.1x10-8	1.04	BMI unadjusted	0.961538	53412620	1		a	c	0.4408	-0.0126	0.0074	0.08714	---		a	c	0.2215	-0.007	0.0177	0.6938	-+
ANKRD55	rs465002	5	55808475	T	C	74.2	25.8	6.1x10-38	1.11	BMI unadjusted	0.900901	55808475	1		t	c	0.7105	0.0224	0.0071	0.001716	+++		t	c	0.583	0.0237	0.0119	0.04712	++
ANKRD55	rs2431115	5	55848669	A	G	40.2	40.2	3.9x10-10	1.04	BMI unadjusted	1.04	55848669	1		a	g	0.3422	0.0153	0.0066	0.02166	+++		a	g	0.3078	0.0167	0.0124	0.1778	-+
ANKRD55	rs9687832	5	55861595	A	G	19.8	19.8	1.7x10-20	1.08	BMI unadjusted	1.08	55861595	1		a	g	0.2191	0.0223	0.0075	0.003057	+-+		a	g	0.224	0.0164	0.0136	0.2262	++
ANKRD55	rs96844	5	56196604	G	A	26.2	26.2	5.4x10-8	1.04	BMI unadjusted	1.04	56196604	1		a	g	0.4686	-0.002	0.0071	0.7795	+-+		a	g	0.4575	0.0024	0.0121	0.8409	+-
PIK3R1	rs4976033	5	67714246	G	A	41.1	41.1	1.0x10-9	1.05	BMI adjusted	1.05	67714246	1		a	g	0.5804	-0.0133	0.0065	0.04169	---		a	g	0.4276	-0.0285	0.0119	0.01717	--
POC5	rs2307111	5	75003678	T	C	60.5	39.5	2.1x10-16	1.05	BMI unadjusted	0.952381	75003678	1		t	c	0.5624	0.0101	0.0071	0.1547	+++		t	c	0.3831	0.0047	0.0147	0.7488	-+
ZBED3	rs4457053	5	76424949	G	A	30.4	30.4	8.4x10-18	1.06	BMI unadjusted	1.06	76424949	1		a	g	0.6619	-0.0058	0.0067	0.3887	-+-		a	g	0.7596	0.0103	0.0135	0.4462	-+
DMGDH	rs1316776	5	78430607	C	A	64.8	35.2	2.6x10-12	1.05	BMI unadjusted	0.952381	78430607	1		a	c	0.3942	-0.0112	0.0072	0.1194	-+-		a	c	0.2452	-0.0214	0.017	0.2073	--
RASA1	rs7719891	5	86577352	G	A	25.9	25.9	2.4x10-8	1.04	BMI unadjusted	1.04	86577352	1		a	g	0.7471	-0.0029	0.0073	0.69	--+		a	g	0.7233	-0.0341	0.0127	0.007446	--
SLCO6A1	rs138337556	5	101232944	G	A	0.36	0.36	4.7x10-9	1.56	BMI unadjusted	1.56	101232944	1
PAM	rs78408340	5	102338739	G	C	0.83	0.83	2.1x10-24	1.47	BMI unadjusted	1.47	102338739	1
PAM	rs115505614	5	102422968	T	C	4.99	4.99	1.3x10-30	1.19	BMI unadjusted	1.19	102422968	1		t	c	0.0291	0.0466	0.0243	0.05563	+++		t	c	0.0347	0.0187	0.041	0.6484	-+
PHF15	rs244665	5	133414622	A	G	70.3	29.7	9.9x10-6	1.03	BMI unadjusted	0.970874	133414622	1		a	g	0.7348	0.006	0.0073	0.4118	+-+		a	g	0.8033	0.0331	0.0153	0.03062	++
PHF15	rs329122	5	133864599	A	G	42.9	42.9	3.6x10-9	1.04	BMI unadjusted	1.04	133864599	1		a	g	0.5387	-0.0026	0.0065	0.6899	-+-		a	g	0.4542	-0.0098	0.0113	0.3863	+-
EBF1	rs3934712	5	157928196	C	T	20.6	20.6	3.2x10-8	1.05	BMI adjusted	1.05	157928196	1		t	c	0.674	-0.0106	0.007	0.1297	---		t	c	0.5919	0.0038	0.0122	0.755	-+
RREB1	rs112498319	6	7035734	C	A	40.9	40.9	4.2x10-7	1.03	BMI unadjusted	1.03	7035734	1		a	c	0.427	0.0006	0.0066	0.9217	-++		a	c	0.3982	-0.0127	0.0121	0.2933	--
RREB1	rs9379084	6	7231843	G	A	88.7	11.3	3.3x10-21	1.11	BMI unadjusted	0.900901	7231843	1		a	g	0.0844	-0.0194	0.0124	0.1171	---		a	g	0.0931	-0.0408	0.0252	0.1053	--
RREB1	rs9505097	6	7255650	C	T	79.9	20.1	8.6x10-10	1.05	BMI unadjusted	0.952381	7255650	1		t	c	0.1427	0.0062	0.0102	0.5436	--+		t	c	0.1864	-0.0069	0.0145	0.6335	-+
CDKAL1	rs7756992	6	20679709	G	A	27.4	27.4	2.4x10-88	1.15	BMI unadjusted	1.15	20679709	1		a	g	0.6407	-0.0259	0.0068	0.0001505	---		a	g	0.5032	-0.0052	0.0117	0.6579	-+
MHC	rs601945	6	32573415	G	A	17.8	17.8	4.7x10-8	1.06	BMI unadjusted	1.06	32573415	1
HMGA1	rs77136196	6	34247047	T	C	4.2	4.2	1.6x10-8	1.11	BMI adjusted	1.11	34247047	1		t	c	0.0317	0.01	0.0248	0.6874	+++		t	c	0.0307	0.0228	0.0435	0.6002	+-
HMGA1	rs2233632	6	34524698	T	C	68.8	31.2	5.3x10-7	1.04	BMI adjusted	0.961538	34524698	1		t	c	0.6477	0.0002	0.0072	0.9804	-+-		t	c	0.4598	-0.0087	0.0118	0.4606	+-
LRFN2	rs34298980	6	40409243	T	C	49.7	49.7	9.3x10-10	1.04	BMI unadjusted	1.04	40409243	1		t	c	0.4331	0.0063	0.0063	0.3199	-++		t	c	0.4316	-0.0203	0.0115	0.07576	--
VEGFA	rs11967262	6	43760327	G	C	48.6	48.6	8.8x10-10	1.04	BMI unadjusted	1.04	43760327	1		c	g	0.4764	-0.0185	0.0067	0.005376	-+-		c	g	0.6781	-0.0261	0.0136	0.05518	--
VEGFA	rs6458354	6	43814190	C	T	28.9	28.9	2.1x10-12	1.05	BMI unadjusted	1.05	43814190	1		t	c	0.7282	0.0027	0.0076	0.7182	--+		t	c	0.5895	0.0217	0.0115	0.05894	++
TFAP2B	rs3798519	6	50788778	C	A	18.4	18.4	2.6x10-12	1.06	BMI unadjusted	1.06	50788778	1		a	c	0.64	-0.022	0.0077	0.004113	---		a	c	0.844	-0.0528	0.0159	0.0009029	--
TFAP2B	rs2465043	6	51180765	G	A	64.4	35.6	2.9x10-6	1.03	BMI unadjusted	0.970874	51180765	1		a	g	0.3054	-0.006	0.0069	0.3895	-+-		a	g	0.2637	-0.0029	0.0131	0.8258	-+
SLC25A51P1	rs555402748	6	67387490	T	C	0.04	0.04	4.6x10-8	3.67	BMI unadjusted	3.67	67387490	1
BEND3	rs4946812	6	107431688	G	A	67.4	32.6	8.2x10-9	1.04	BMI unadjusted	0.961538	107431688	1		a	g	0.216	-0.0076	0.0078	0.3307	---		a	g	0.2024	-0.0263	0.0146	0.07102	--
CENPW	rs11759026	6	126792095	G	A	23.2	23.2	2.4x10-18	1.07	BMI unadjusted	1.07	126792095	1		a	g	0.571	-0.0325	0.0076	1.76e-05	---		a	g	0.8232	-0.029	0.0167	0.08255	--
SOGA3	rs2800733	6	127416930	A	G	71.7	28.4	6.0x10-11	1.05	BMI unadjusted	0.952381	127416930	1		a	g	0.7631	0.0261	0.0075	0.0005027	+++		a	g	0.7178	0.0243	0.0125	0.05084	++
SLC35D3	rs9494624	6	137300960	A	G	29	29	6.1x10-9	1.04	BMI unadjusted	1.04	137300960	1		a	g	0.2811	-0.0022	0.0074	0.7617	-++		a	g	0.3973	0.0111	0.0117	0.3452	++
MIR3668	rs2982521	6	139835329	A	T	38	38	1.3x10-9	1.05	BMI adjusted	1.05	139835329	1		a	t	0.4492	0.0159	0.0064	0.01315	+++		a	t	0.4895	0.001	0.0114	0.9333	-+
MIR3668	rs616279	6	140249466	A	G	73.8	26.2	6.7x10-7	1.04	BMI adjusted	0.961538	140249466	1		a	g	0.7156	0.0036	0.0077	0.6372	-++		a	g	0.8225	-0.0004	0.0172	0.983	-+
SLC22A3	rs474513	6	160770312	A	G	51.7	48.3	8.1x10-10	1.04	BMI unadjusted	0.961538	160770312	1		a	g	0.5618	0.0148	0.0068	0.0301	+++		a	g	0.4549	0.0276	0.0114	0.01532	++
QKI	rs4709746	6	164133001	C	T	86.8	13.2	5.8x10-9	1.06	BMI unadjusted	0.943396	164133001	1		t	c	0.3094	-0.0235	0.0079	0.002982	---		t	c	0.0916	-0.0086	0.0233	0.7125	+-
DGKB	rs17168486	7	14898282	T	C	18.1	18.1	2.3x10-17	1.07	BMI unadjusted	1.07	14898282	1		t	c	0.412	0.0192	0.0076	0.01179	+++		t	c	0.15	0.0278	0.016	0.0828	++
DGKB	rs10228066	7	15063569	T	C	53.7	46.3	1.1x10-28	1.07	BMI unadjusted	0.934579	15063569	1		t	c	0.4811	0.0074	0.0064	0.2481	+++		t	c	0.5624	0.011	0.0113	0.3313	++
DGKB	rs2908334	7	15206239	T	C	63.1	36.9	5.9x10-6	1.03	BMI unadjusted	0.970874	15206239	1		t	c	0.4941	0.0006	0.0065	0.922	++-		t	c	0.4535	-0.0015	0.0119	0.8975	-+
IGF2BP3	rs78840640	7	23434606	G	C	2.2	2.2	2.8x10-6	1.11	BMI unadjusted	1.11	23434606	1
IGF2BP3	rs4279506	7	23512896	G	C	61	39	4.8x10-8	1.06	BMI unadjusted	0.943396	23512896	1		c	g	0.5775	-0.0123	0.007	0.07657	+--		c	g	0.4882	-0.0205	0.0116	0.07653	--
JAZF1	rs1708302	7	28198677	C	T	51.2	48.8	1.1x10-48	1.1	BMI unadjusted	0.909091	28198677	1		t	c	0.3516	-0.0288	0.0069	3.03e-05	---		t	c	0.3193	-0.0297	0.0131	0.02384	--
CRHR2	rs917195	7	30728452	C	T	77	23	4.2x10-11	1.05	BMI unadjusted	0.952381	30728452	1		t	c	0.341	-0.0051	0.0073	0.4845	---		t	c	0.5824	0.0147	0.0136	0.2804	++
GCK	rs878521	7	44255643	A	G	24.5	24.5	1.9x10-13	1.06	BMI unadjusted	1.06	44255643	1		a	g	0.3839	0.009	0.0065	0.1656	+++		a	g	0.4438	0.0154	0.0116	0.1842	++
GCK	rs116913033	7	44365549	C	T	83	17	7.1x10-6	1.04	BMI unadjusted	0.961538	44365549	1		t	c	0.0885	-0.0124	0.013	0.3378	--+		t	c	0.1017	-0.0242	0.024	0.3125	-+
FBXL13	rs56376556	7	102038318	T	C	5.33	5.33	1.7x10-6	1.08	BMI unadjusted	1.08	102038318	1
FBXL13	rs11496066	7	102486254	T	C	81.8	18.2	1.1x10-8	1.08	BMI unadjusted	0.925926	102486254	1		t	c	0.8623	0.0073	0.01	0.4641	++-		t	c	0.8356	0.0023	0.0152	0.8774	-+
RELN	rs62482405	7	102987583	G	T	8.19	8.19	6.9x10-6	1.05	BMI unadjusted	1.05	102987583	1		t	g	0.856	-0.0073	0.0103	0.4786	--+		t	g	0.9324	-0.0069	0.0268	0.7951	+-
RELN	rs39328	7	103444978	T	C	43.3	43.3	3.7x10-8	1.04	BMI unadjusted	1.04	103444978	1		t	c	0.4263	0.005	0.0064	0.4337	+++		t	c	0.3898	0.0109	0.0115	0.3433	++
CTTNBP2	rs6976111	7	117495667	A	C	31.3	31.3	1.2x10-8	1.04	BMI unadjusted	1.04	117495667	1		a	c	0.217	0.0112	0.0082	0.1741	+++		a	c	0.2218	0.017	0.0167	0.3078	++
KLF14	rs2268382	7	130027037	C	A	32.7	32.7	7.4x10-6	1.03	BMI unadjusted	1.03	130027037	1		a	c	0.5292	-0.0038	0.0065	0.5622	---		a	c	0.556	0.0042	0.0114	0.7126	-+
KLF14	rs1562396	7	130457914	G	A	31.9	31.9	9.9x10-18	1.06	BMI unadjusted	1.06	130457914	1		a	g	0.6486	-0.0187	0.0067	0.004878	-+-		a	g	0.7186	-0.0164	0.0127	0.1962	-+
AOC1	rs62492368	7	150537635	A	G	30.8	30.8	1.1x10-10	1.05	BMI unadjusted	1.05	150537635	1		a	g	0.4636	0.0137	0.0065	0.03629	+-+		a	g	0.5077	0.0062	0.0118	0.6004	+-
MNX1	rs6459733	7	156930550	G	C	67.3	32.7	2.4x10-17	1.06	BMI unadjusted	0.943396	156930550	1		c	g	0.4554	-0.0265	0.0067	7.88e-05	---		c	g	0.5232	-0.0272	0.0119	0.0222	--
MSRA	rs17689007	8	9974824	G	A	53.3	46.7	2.5x10-9	1.04	BMI unadjusted	0.961538	9974824	1		a	g	0.3437	-0.013	0.0082	0.1136	---		a	g	0.4059	0.0116	0.0119	0.33	-+
XKR6	rs57327348	8	10808687	A	T	78.2	21.8	4.5x10-8	1.04	BMI unadjusted	0.961538	10808687	1		a	t	0.8092	0.0044	0.0081	0.5864	-++		a	t	0.7724	-0.0046	0.0138	0.7419	-+
LPL	rs10096633	8	19830921	C	T	87.7	12.3	1.1x10-12	1.07	BMI unadjusted	0.934579	19830921	1		t	c	0.2271	-0.0111	0.0095	0.243	---		t	c	0.3644	-0.0025	0.0127	0.8453	-+
PURG	rs10954772	8	30863938	T	C	31.4	31.4	1.8x10-9	1.04	BMI unadjusted	1.04	30863938	1		t	c	0.3316	0.0086	0.0071	0.2211	--+		t	c	0.4731	0.0061	0.0115	0.5926	++
ANK1	rs13262861	8	41508577	C	A	82.9	17.1	4.0x10-12	1.07	BMI unadjusted	0.934579	41508577	1		a	c	0.1514	0.0018	0.0093	0.8431	++-		a	c	0.1301	0.0083	0.0199	0.6764	++
ANK1	rs4736819	8	41509915	T	C	55.4	44.6	5.4x10-7	1.04	BMI unadjusted	0.961538	41509915	1		t	c	0.5837	0.0145	0.0064	0.02269	+++		t	c	0.5796	0.0312	0.0115	0.006836	++
ANK1	rs148766658	8	41552046	C	T	3.78	3.78	5.7x10-7	1.09	BMI unadjusted	1.09	41552046	1		t	c	0.9784	0.073	0.0235	0.001867	+++		t	c	0.9785	0.0751	0.0455	0.09865	++
TP53INP1	rs11786992	8	95685147	A	C	64.4	35.6	5.3x10-6	1.03	BMI unadjusted	0.970874	95685147	1		a	c	0.6539	0.0058	0.0068	0.3931	--+		a	c	0.5797	0.0073	0.0116	0.5294	++
TP53INP1	rs10097617	8	95961626	T	C	48.5	48.5	3.3x10-11	1.04	BMI unadjusted	1.04	95961626	1		t	c	0.4723	0.0106	0.0065	0.1029	+-+		t	c	0.5901	-0.0026	0.0117	0.8265	+-
TP53INP1	rs187936726	8	96092422	G	A	2.39	2.39	5.4x10-6	1.11	BMI unadjusted	1.11	96092422	1		a	g	0.9891	-0.0478	0.0401	0.2335	---		a	g	0.9881	-0.0946	0.0652	0.1472	--
CPQ	rs149364428	8	97737741	A	G	1.04	1.04	1.8x10-12	1.27	BMI unadjusted	1.27	97737741	1
TRHR	rs12680028	8	110123183	C	G	53.4	46.6	2.5x10-8	1.04	BMI unadjusted	0.961538	110123183	1		c	g	0.3901	0.0001	0.0073	0.9913	+--		c	g	0.3559	0.009	0.0137	0.5115	++
SLC30A8	rs3802177	8	118185025	G	A	68.5	31.5	1.1x10-55	1.11	BMI unadjusted	0.900901	118185025	1
SLC30A8	rs80244329	8	118404672	G	A	97.8	2.19	6.9x10-6	1.11	BMI unadjusted	0.900901	118404672	1
CASC11	rs17772814	8	128711742	G	A	91.5	8.49	5.4x10-10	1.08	BMI unadjusted	0.925926	128711742	1
PVT1	rs1561927	8	129568078	C	T	26.9	26.9	1.5x10-9	1.04	BMI unadjusted	1.04	129568078	1
BOP1	rs4977213	8	145507304	C	T	37.5	37.5	9.1x10-14	1.05	BMI unadjusted	1.05	145507304	1		t	c	0.7527	-0.0195	0.0078	0.01312	---		t	c	0.7305	-0.0041	0.0135	0.7616	--
BOP1	rs12719778	8	145879883	T	C	53.8	46.2	5.0x10-9	1.04	BMI unadjusted	0.961538	145879883	1		t	c	0.5906	0.0054	0.0068	0.4296	+++		t	c	0.7074	-0.0138	0.0142	0.3312	--
GLIS3	rs510807	9	3965689	A	C	49.1	49.1	1.4x10-6	1.03	BMI unadjusted	1.03	3965689	1		a	c	0.41	-0.0165	0.0065	0.01125	---		a	c	0.4999	-0.0165	0.0112	0.1399	--
GLIS3	rs79103584	9	4243045	T	A	98.6	1.38	4.4x10-6	1.14	BMI unadjusted	0.877193	4243045	1		a	t	0.017	-0.0141	0.0241	0.5585	-+-		a	t	0.017	-0.0658	0.0442	0.137	--
GLIS3	rs10974438	9	4291928	C	A	35.7	35.7	1.5x10-14	1.05	BMI unadjusted	1.05	4291928	1		a	c	0.7164	-0.0328	0.0071	3.34e-06	---		a	c	0.7413	-0.0264	0.0141	0.0615	--
HAUS6	rs7022807	9	19067833	G	A	40.1	40.1	2.7x10-10	1.04	BMI unadjusted	1.04	19067833	1		a	g	0.5882	-0.0066	0.0067	0.3273	++-		a	g	0.4304	0.0078	0.012	0.5115	++
FOCAD	rs7867635	9	20241069	C	T	41.2	41.2	4.0x10-8	1.04	BMI unadjusted	1.04	20241069	1		t	c	0.4304	0.0031	0.0066	0.6372	-++		t	c	0.3909	0.0132	0.0124	0.2856	++
FOCAD	rs7847880	9	20662703	C	T	84.3	15.7	2.1x10-6	1.04	BMI unadjusted	0.961538	20662703	1		t	c	0.1099	-0.0106	0.0107	0.3214	-+-		t	c	0.1395	0.0014	0.0164	0.9309	-+
CDKN2A/B	rs1412830	9	22043612	C	T	62.8	37.2	9.1x10-8	1.04	BMI unadjusted	0.961538	22043612	1		t	c	0.2343	-0.0013	0.0086	0.8826	-+-		t	c	0.2708	-0.0093	0.0166	0.573	--
CDKN2A/B	rs76011118	9	22133773	A	G	3.41	3.41	1.4x10-7	1.11	BMI unadjusted	1.11	22133773	1
CDKN2A/B	rs10811660	9	22134068	G	A	82.8	17.2	1.4x10-115	1.27	BMI unadjusted	0.787402	22134068	1
CDKN2A/B	rs10757283	9	22134172	T	C	43	43	1.7x10-41	1.11	BMI unadjusted	1.11	22134172	1		t	c	0.4254	0.0031	0.0063	0.618	-++		t	c	0.4195	-0.0161	0.0114	0.1573	-+
CDKN2A/B	rs1333052	9	22157908	A	C	66	34	6.3x10-7	1.03	BMI unadjusted	0.970874	22157908	1		a	c	0.5679	-0.0009	0.0065	0.8877	++-		a	c	0.6384	0.0042	0.0119	0.7204	-+
CDKN2A/B	rs1575972	9	22301092	T	A	96.7	3.29	3.1x10-7	1.1	BMI unadjusted	0.909091	22301092	1		a	t	0.1737	-0.0425	0.0132	0.001236	---		a	t	0.2284	-0.0132	0.0152	0.3861	--
LINGO2	rs1412234	9	28410683	C	T	32.3	32.3	1.9x10-10	1.04	BMI unadjusted	1.04	28410683	1		t	c	0.7565	-0.0129	0.0075	0.08335	+--		t	c	0.7728	-0.0124	0.0142	0.382	--
UBAP2	rs12001437	9	34074476	C	T	37.2	37.2	2.8x10-10	1.04	BMI unadjusted	1.04	34074476	1		t	c	0.5913	-0.0083	0.0066	0.2116	+--		t	c	0.6121	-0.0005	0.0116	0.969	+-
MTND2P8	rs11137820	9	81359113	C	G	57.5	42.5	2.9x10-8	1.04	BMI unadjusted	0.961538	81359113	1		c	g	0.479	0.0051	0.0065	0.4259	+++		c	g	0.5272	0.0199	0.0113	0.07938	++
TLE4	rs17791513	9	81905590	A	G	93.2	6.83	3.1x10-14	1.1	BMI unadjusted	0.909091	81905590	1		a	g	0.8478	-0.0019	0.0098	0.8477	--+		a	g	0.9434	-0.005	0.0258	0.8457	+-
TLE1	rs2796441	9	84308948	G	A	59.2	40.8	4.4x10-24	1.07	BMI unadjusted	0.934579	84308948	1
ZNF169	rs55653563	9	97001682	A	C	73.2	26.8	2.2x10-9	1.04	BMI unadjusted	0.961538	97001682	1		a	c	0.8125	0.026	0.0086	0.002601	+++		a	c	0.7694	0.0302	0.0135	0.02478	++
ZNF169	rs12236906	9	97497494	T	C	98.7	1.28	3.4x10-6	1.15	BMI unadjusted	0.869565	97497494	1		t	c	0.9918	-0.0467	0.0352	0.1851	---		t	c	0.9872	0.0836	0.0521	0.1085	++
ABO	rs505922	9	136149229	C	T	33.2	33.2	3.9x10-12	1.05	BMI unadjusted	1.05	136149229	1		t	c	0.7304	-0.0228	0.0076	0.002883	---		t	c	0.6297	-0.0069	0.0117	0.5578	+-
GPSM1	rs78403475	9	139235606	G	C	89.6	10.4	1.2x10-6	1.06	BMI unadjusted	0.943396	139235606	1		c	g	0.0835	0.0113	0.0116	0.3323	+++		c	g	0.0741	-0.014	0.0234	0.5479	-+
GPSM1	rs28505901	9	139241030	G	A	75.2	24.8	6.7x10-26	1.09	BMI unadjusted	0.917431	139241030	1		a	g	0.266	-0.0245	0.0072	0.0006368	+--		a	g	0.2271	-0.0209	0.0134	0.1192	--
GPSM1	rs11793035	9	139507212	C	T	33.1	33.1	2.2x10-7	1.04	BMI unadjusted	1.04	139507212	1		t	c	0.5472	-0.0091	0.0065	0.16	---		t	c	0.4079	-0.0414	0.0124	0.000862	--
GPSM1	9:139737088:G:A	9	139737088	A	G	0.07	0.07	7.9x10-6	2.74	BMI unadjusted	2.74	139737088	1
CDC123/CAMK1D	rs11257655	10	12307894	T	C	21.8	21.8	1.5x10-32	1.09	BMI unadjusted	1.09	12307894	1
NEUROG3	rs177045	10	71321279	G	A	31.6	31.6	6.6x10-18	1.07	BMI unadjusted	1.07	71321279	1		a	g	0.6025	-0.0078	0.0064	0.2243	---		a	g	0.5906	-0.0027	0.0113	0.8117	-+
NEUROG3	rs61850200	10	71321658	C	G	27.7	27.7	7.3x10-6	1.04	BMI unadjusted	1.04	71321658	1		c	g	0.2728	0.0009	0.0072	0.8989	-+-		c	g	0.1871	0.0049	0.0164	0.7633	-+
NEUROG3	rs41277236	10	71332301	T	C	4.31	4.31	1.5x10-6	1.09	BMI unadjusted	1.09	71332301	1
NEUROG3	rs549498088	10	71347311	T	C	0.6	0.6	4.7x10-7	1.56	BMI unadjusted	1.56	71347311	1
NEUROG3	rs2642588	10	71466578	G	T	70.2	29.8	2.2x10-14	1.05	BMI unadjusted	0.952381	71466578	1
ZMIZ1	rs703972	10	80952826	G	C	53.3	46.7	1.7x10-29	1.07	BMI unadjusted	0.934579	80952826	1		c	g	0.4494	-0.0141	0.0063	0.02627	-+-		c	g	0.3844	-0.0222	0.0117	0.05679	--
ZMIZ1	rs1317617	10	81096589	G	A	79.8	20.2	1.8x10-6	1.04	BMI unadjusted	0.961538	81096589	1		a	g	0.4054	-0.0031	0.0069	0.6554	+--		a	g	0.3116	-0.0128	0.0126	0.3092	+-
PTEN	rs11202627	10	89769340	T	C	15.2	15.2	4.7x10-8	1.06	BMI adjusted	1.06	89769340	1		t	c	0.2097	0.0188	0.0082	0.02197	+++		t	c	0.1202	0.023	0.0188	0.2212	++
HHEX/IDE	rs7078559	10	93924663	T	C	57.8	42.2	4.1x10-7	1.03	BMI unadjusted	0.970874	93924663	1		t	c	0.6936	0.0061	0.0075	0.4154	+--		t	c	0.7373	0.0161	0.0154	0.2956	+-
HHEX/IDE	rs10882101	10	94462427	T	C	58.7	41.3	1.4x10-8	1.06	BMI unadjusted	0.943396	94462427	1		t	c	0.6108	0.0296	0.0065	6.06e-06	+++		t	c	0.6244	0.0227	0.0116	0.05033	++
HHEX/IDE	rs1112718	10	94479107	A	G	59.8	40.2	5.0x10-7	1.06	BMI unadjusted	0.943396	94479107	1		a	g	0.4923	0.0228	0.0066	0.0005781	+++		a	g	0.5863	0.0153	0.0113	0.1768	++
TCF7L2	rs536643418	10	114699835	G	C	0.52	0.52	2.6x10-8	1.5	BMI unadjusted	1.5	114699835	1
TCF7L2	rs140242150	10	114702962	A	G	0.5	0.5	2.2x10-8	1.36	BMI unadjusted	1.36	114702962	1
TCF7L2	rs7918400	10	114703136	T	C	47.6	47.6	2.0x10-15	1.06	BMI unadjusted	1.06	114703136	1		t	c	0.5422	0.0027	0.0064	0.6738	++-		t	c	0.4839	0.0253	0.0112	0.02376	++
TCF7L2	rs184509201	10	114740337	C	G	98.2	1.82	1.2x10-13	1.21	BMI unadjusted	0.826446	114740337	1		c	g	0.9884	0.0566	0.0313	0.07021	+-+		c	g	0.9889	0.1565	0.0661	0.01788	++
TCF7L2	rs180988137	10	114751173	G	A	1.04	1.04	6.1x10-6	1.17	BMI unadjusted	1.17	114751173	1
TCF7L2	rs78025551	10	114757956	C	G	85.1	14.9	1.6x10-7	1.05	BMI unadjusted	0.952381	114757956	1		c	g	0.913	0.0232	0.0125	0.06306	+++		c	g	0.8932	0.0022	0.0184	0.9065	-+
TCF7L2	rs7903146	10	114758349	T	C	29.5	29.5	5.8x10-447	1.37	BMI unadjusted	1.37	114758349	1		t	c	0.2392	0.071	0.0078	7.95e-20	+++		t	c	0.3232	0.0404	0.0122	0.000907	++
TCF7L2	rs34855922	10	114871594	A	G	71.6	28.4	5.5x10-12	1.05	BMI unadjusted	0.952381	114871594	1		a	g	0.8609	0.0013	0.0102	0.9006	-++		a	g	0.843	-0.0274	0.018	0.1279	--
WDR11	rs72631105	10	122915345	A	G	19	19	3.7x10-9	1.06	BMI adjusted	1.06	122915345	1		a	g	0.1573	0.01	0.009	0.2667	+++		a	g	0.1338	0.007	0.0199	0.7246	-+
PLEKHA1	rs2280141	10	124193181	T	G	51.6	48.4	1.4x10-13	1.05	BMI unadjusted	0.952381	124193181	1		t	g	0.368	0.0145	0.007	0.03767	+++		t	g	0.4144	0.0081	0.0116	0.4853	++
INS/IGF2	rs12802972	11	1704596	A	G	42.8	42.8	1.5x10-6	1.03	BMI unadjusted	1.03	1704596	1		a	g	0.472	-0.0033	0.0066	0.6208	++-		a	g	0.2904	0.0099	0.0135	0.463	+-
INS/IGF2	rs11042596	11	2118860	G	T	66.5	33.5	2.0x10-8	1.04	BMI unadjusted	0.961538	2118860	1										t	g	0.2241	-0.0225	0.0154	0.1449	--
INS/IGF2	rs555759341	11	2151761	C	G	0.49	0.49	3.6x10-8	1.38	BMI unadjusted	1.38	2151761	1
INS/IGF2	rs571342427	11	2182519	C	T	0.15	0.15	1.0x10-6	1.68	BMI unadjusted	1.68	2182519	1
INS/IGF2	rs4929965	11	2197286	A	G	38.3	38.3	4.0x10-26	1.07	BMI unadjusted	1.07	2197286	1		a	g	0.4094	0.0271	0.0067	5.75e-05	+++		a	g	0.606	0.025	0.0123	0.0426	++
KCNQ1	rs4930091	11	2372356	C	T	75.9	24.1	3.7x10-6	1.04	BMI unadjusted	0.961538	2372356	1		t	c	0.4742	0.0129	0.0071	0.06836	-++		t	c	0.5916	0.004	0.0137	0.7699	-+
KCNQ1	rs2283164	11	2579163	A	G	94.7	5.32	1.2x10-7	1.08	BMI unadjusted	0.925926	2579163	1
KCNQ1	rs80102379	11	2634177	G	T	98.2	1.78	9.3x10-8	1.15	BMI unadjusted	0.869565	2634177	1
KCNQ1	rs231349	11	2672821	T	C	10.2	10.2	2.3x10-11	1.07	BMI unadjusted	1.07	2672821	1										t	c	0.101	0.0294	0.019	0.1215	++
KCNQ1	rs231361	11	2691500	A	G	25.6	25.6	5.0x10-25	1.08	BMI unadjusted	1.08	2691500	1		a	g	0.417	0.0207	0.0066	0.00177	+++		a	g	0.3564	0.0048	0.0118	0.683	-+
KCNQ1	rs2283220	11	2755548	A	G	69	31	1.4x10-9	1.05	BMI unadjusted	0.952381	2755548	1										a	g	0.7427	0.0212	0.0126	0.09202	++
KCNQ1	rs234853	11	2850828	G	A	24.8	24.8	6.8x10-16	1.08	BMI unadjusted	1.08	2850828	1		a	g	0.6027	0.0297	0.0065	5.26e-06	+++		a	g	0.5682	-0.008	0.0116	0.4931	--
KCNQ1	rs2237895	11	2857194	C	A	42.6	42.6	6.0x10-52	1.12	BMI unadjusted	1.12	2857194	1		a	c	0.6114	-0.0293	0.0066	8e-06	-+-		a	c	0.7152	0.0035	0.0132	0.7912	-+
KCNQ1	rs2237897	11	2858546	C	T	95.4	4.57	8.4x10-32	1.23	BMI unadjusted	0.813008	2858546	1		t	c	0.2481	-0.053	0.0086	7.87e-10	---		t	c	0.075	-0.0502	0.0223	0.02423	--
KCNQ1	rs445084	11	2908754	G	A	36.1	36.1	1.7x10-6	1.03	BMI unadjusted	1.03	2908754	1		a	g	0.6794	-0.0108	0.0067	0.1079	---		a	g	0.7005	-0.0008	0.0125	0.952	-+
PDE3B	rs141521721	11	14763828	A	C	2.36	2.36	2.7x10-8	1.13	BMI unadjusted	1.13	14763828	1		a	c	0.0119	0.0455	0.0323	0.1584	+++		a	c	0.0124	0.1675	0.0656	0.01067	++
KCNJ11	rs5213	11	17408404	C	T	36.2	36.2	3.5x10-27	1.07	BMI unadjusted	1.07	17408404	1		t	c	0.6539	-0.0151	0.0071	0.03353	---		t	c	0.7502	0.0351	0.0159	0.02714	++
KCNJ11	rs67254669	11	17470143	G	A	0.11	0.11	1.1x10-8	1.89	BMI unadjusted	1.89	17470143	1
METTL15	rs4923543	11	28534898	A	G	33.2	33.2	4.5x10-8	1.04	BMI adjusted	1.04	28534898	1										a	g	0.4806	0.0094	0.0116	0.4208	+-
QSER1	rs7943101	11	32460873	T	C	16.1	16.1	8.5x10-6	1.04	BMI unadjusted	1.04	32460873	1		t	c	0.1903	0.0227	0.0098	0.02062	+++		t	c	0.2925	0.0131	0.0128	0.3083	++
QSER1	rs145678014	11	32927778	G	T	95.7	4.33	2.0x10-10	1.11	BMI unadjusted	0.900901	32927778	1		t	g	0.0236	-0.0143	0.025	0.566	+--		t	g	0.0272	0.0887	0.0488	0.06927	++
QSER1	rs528122639	11	33091735	A	G	0.09	0.09	1.6x10-7	2.09	BMI unadjusted	2.09	33091735	1
PDHX	rs286925	11	34642668	A	G	18.2	18.2	5.0x10-6	1.04	BMI unadjusted	1.04	34642668	1		a	g	0.295	0.0039	0.007	0.581	-+-		a	g	0.2605	0.0042	0.013	0.7474	-+
PDHX	rs2767036	11	34982148	C	A	29.1	29.1	3.3x10-8	1.04	BMI unadjusted	1.04	34982148	1		a	c	0.5217	0.0062	0.0069	0.3706	-++		a	c	0.4517	-0.0036	0.0123	0.7664	-+
HSD17B12	rs1061810	11	43877934	A	C	28.8	28.8	6.0x10-13	1.05	BMI unadjusted	1.05	43877934	1		a	c	0.4347	-0.0047	0.0067	0.4772	---		a	c	0.3682	-0.0053	0.0117	0.6514	+-
CRY2	rs7115753	11	45912013	A	G	44.9	44.9	3.8x10-9	1.04	BMI unadjusted	1.04	45912013	1		a	g	0.4955	0.0038	0.0065	0.5601	+-+		a	g	0.6145	0.0049	0.0122	0.6862	-+
CELF1	rs7124681	11	47529947	A	C	41	41	5.1x10-9	1.04	BMI unadjusted	1.04	47529947	1
MAP3K11	rs1783541	11	65294799	T	C	20.4	20.4	2.0x10-14	1.06	BMI unadjusted	1.06	65294799	1
CCND1	rs61881115	11	68997225	G	A	83.8	16.2	4.1x10-7	1.05	BMI unadjusted	0.952381	68997225	1		a	g	0.0998	-0.0084	0.0121	0.4876	---		a	g	0.1194	0.0106	0.0231	0.6453	-+
CCND1	rs11820019	11	69448758	T	C	97.3	2.67	5.1x10-12	1.16	BMI unadjusted	0.862069	69448758	1		t	c	0.9418	0.0357	0.0174	0.04071	-++		t	c	0.9163	0.0146	0.0216	0.4978	++
CENTD2/ARAP1	rs77464186	11	72460398	A	C	83.6	16.4	4.7x10-33	1.11	BMI unadjusted	0.900901	72460398	1		a	c	0.9037	0.0142	0.0116	0.2208	+++		a	c	0.9002	-0.0065	0.0213	0.759	-+
MTNR1B	rs10830963	11	92708710	G	C	27.7	27.7	4.8x10-43	1.1	BMI unadjusted	1.1	92708710	1		c	g	0.7805	-0.0177	0.0079	0.02495	---		c	g	0.7884	-0.0185	0.0164	0.259	--
MTNR1B	rs57235767	11	93013531	C	T	70.6	29.4	5.9x10-10	1.04	BMI unadjusted	0.961538	93013531	1		t	c	0.2264	-0.0074	0.0084	0.378	--+		t	c	0.3094	-0.015	0.0123	0.2241	--
ETS1	rs10893829	11	128042575	T	C	85.3	14.7	1.3x10-10	1.06	BMI unadjusted	0.943396	128042575	1		t	c	0.6796	0.0222	0.0071	0.001657	-++		t	c	0.706	0.0102	0.0129	0.4306	-+
ETS1	rs10750397	11	128234144	A	G	28.2	28.2	8.3x10-13	1.05	BMI unadjusted	1.05	128234144	1
ETS1	rs67232546	11	128398938	T	C	20.7	20.7	1.3x10-11	1.06	BMI unadjusted	1.06	128398938	1		t	c	0.1538	0.0093	0.0091	0.3068	+-+		t	c	0.1737	0.0219	0.0154	0.1557	++
ETS1	rs112595469	11	128583975	T	C	2.84	2.84	6.2x10-6	1.1	BMI unadjusted	1.1	128583975	1		t	c	0.013	0.0067	0.0329	0.8376	+-+		t	c	0.0194	-0.0158	0.0528	0.7648	-+
CCND2	rs10848958	12	4031104	C	T	80.4	19.6	1.5x10-7	1.04	BMI unadjusted	0.961538	4031104	1
CCND2	rs11063028	12	4300172	C	T	18	18	8.5x10-11	1.06	BMI unadjusted	1.06	4300172	1		t	c	0.854	-0.0115	0.0091	0.2063	---		t	c	0.8267	-0.0075	0.0148	0.6113	-+
CCND2	rs4238013	12	4376089	C	T	20.9	20.9	3.2x10-11	1.06	BMI unadjusted	1.06	4376089	1
CCND2	rs3217792	12	4384696	C	T	91.3	8.69	2.6x10-21	1.12	BMI unadjusted	0.892857	4384696	1
CCND2	rs76895963	12	4384844	T	G	98	1.98	1.4x10-69	1.62	BMI unadjusted	0.617284	4384844	1
CCND2	rs3217860	12	4399050	G	A	25.8	25.8	3.9x10-9	1.05	BMI unadjusted	1.05	4399050	1
CDKN1B	rs2066827	12	12871099	G	T	23.5	23.5	4.2x10-8	1.05	BMI unadjusted	1.05	12871099	1
ITPR2	rs718314	12	26453283	G	A	25.3	25.3	8.4x10-11	1.05	BMI unadjusted	1.05	26453283	1		a	g	0.5379	-0.01	0.0074	0.1772	--+		a	g	0.7628	-0.0068	0.0131	0.6054	-+
KLHDC5	rs10842994	12	27965150	C	T	80.5	19.5	4.1x10-20	1.08	BMI unadjusted	0.925926	27965150	1		t	c	0.1621	-0.006	0.0089	0.5056	-+-		t	c	0.1417	-0.0029	0.0203	0.8851	-+
HMGA2	rs2258238	12	66221060	T	A	10.4	10.4	4.5x10-21	1.1	BMI unadjusted	1.1	66221060	1		a	t	0.8229	-0.0115	0.01	0.2484	---		a	t	0.7181	-0.0229	0.0135	0.09081	--
HMGA2	rs1042725	12	66358347	T	C	49	49	1.8x10-13	1.05	BMI unadjusted	1.05	66358347	1		t	c	0.5898	0.02	0.0066	0.002494	+-+		t	c	0.4515	0.0149	0.0114	0.1909	++
TSPAN8/LGR5	rs1796330	12	71522953	G	C	57.1	42.9	2.2x10-14	1.05	BMI unadjusted	0.952381	71522953	1		c	g	0.5057	-0.0139	0.0065	0.03158	+--		c	g	0.4196	0.0166	0.0116	0.1534	++
USP44	rs2197973	12	95928560	T	C	53.8	46.3	3.6x10-8	1.04	BMI unadjusted	0.961538	95928560	1		t	c	0.7116	0.0124	0.0076	0.104	+-+		t	c	0.7009	0.0151	0.014	0.2787	++
RMST	rs759111467	12	97562756	A	G	0.03	0.03	1.7x10-6	3.07	BMI unadjusted	3.07	97562756	1
RMST	rs557027608	12	97779248	A	G	0.06	0.06	2.7x10-7	2.34	BMI unadjusted	2.34	97779248	1
RMST	rs77864822	12	97848775	A	G	93.2	6.76	1.1x10-8	1.08	BMI unadjusted	0.925926	97848775	1		a	g	0.9603	0.0005	0.0179	0.9755	+-+		a	g	0.9576	-0.0298	0.0302	0.3239	--
WSCD2	rs1426371	12	108629780	G	A	73.9	26.1	8.2x10-12	1.05	BMI unadjusted	0.952381	108629780	1		a	g	0.2325	-0.0162	0.0078	0.03701	---		a	g	0.1873	-0.009	0.0174	0.6046	-+
KSR2	rs34965774	12	118412373	A	G	14.4	14.4	2.0x10-9	1.06	BMI unadjusted	1.06	118412373	1		a	g	0.2027	0.0247	0.0082	0.002538	+++		a	g	0.2909	0.0169	0.0129	0.1905	++
KSR2	rs12578639	12	118489636	A	T	82.8	17.2	2.2x10-6	1.04	BMI unadjusted	0.961538	118489636	1		a	t	0.8116	0.0024	0.0081	0.7703	-+-		a	t	0.7888	0.0014	0.0138	0.9196	-+
HNF1A	rs11065299	12	121297815	A	G	7.54	7.54	5.8x10-7	1.06	BMI unadjusted	1.06	121297815	1
HNF1A	rs73226260	12	121380541	G	A	96.7	3.31	5.9x10-11	1.13	BMI unadjusted	0.884956	121380541	1		a	g	0.0208	-0.0002	0.0238	0.9937	++-		a	g	0.0203	0.0705	0.0509	0.1657	++
HNF1A	rs1800574	12	121416864	T	C	2.96	2.96	1.7x10-12	1.14	BMI unadjusted	1.14	121416864	1		t	c	0.0164	0.0511	0.0286	0.07352	+-+		t	c	0.0233	0.0941	0.055	0.08729	++
HNF1A	rs56348580	12	121432117	G	C	68.9	31.1	2.3x10-13	1.05	BMI unadjusted	0.952381	121432117	1		c	g	0.3755	-0.0115	0.0069	0.0942	-+-		c	g	0.2336	0.0108	0.0135	0.4259	++
HNF1A	rs28638142	12	121501461	A	C	4.42	4.42	2.9x10-6	1.08	BMI unadjusted	1.08	121501461	1		a	c	0.0278	-0.0031	0.0227	0.89	++-		a	c	0.0338	0.0401	0.0404	0.3213	++
HNF1A	rs73224262	12	121882395	T	C	0.68	0.68	9.1x10-7	1.24	BMI unadjusted	1.24	121882395	1
MPHOSPH9	rs4148856	12	123450765	C	G	78.1	21.9	1.7x10-10	1.05	BMI unadjusted	0.952381	123450765	1		c	g	0.7352	-0.0039	0.0075	0.6008	+--		c	g	0.759	-0.0006	0.0137	0.9664	+-
ZNF664	rs7978610	12	124468572	G	C	66.6	33.5	2.0x10-8	1.27	BMI adjusted	0.787402	124468572	1		c	g	0.2831	-0.025	0.0073	0.0006113	---		c	g	0.3286	-0.0043	0.012	0.7206	+-
ZNF664	rs825452	12	124509177	A	G	60.3	39.7	2.4x10-6	1.04	BMI adjusted	0.961538	124509177	1		a	g	0.5227	0.0073	0.0063	0.2485	+++		a	g	0.502	0.01	0.0116	0.3846	+-
FBRSL1	rs12811407	12	133069698	A	G	33.1	33.1	1.7x10-12	1.05	BMI unadjusted	1.05	133069698	1		a	g	0.2164	0.0205	0.0082	0.01183	+++		a	g	0.2446	0.0242	0.0136	0.07626	++
RNF6	rs34584161	13	26776999	A	G	76	24	2.2x10-10	1.05	BMI unadjusted	0.952381	26776999	1		a	g	0.6589	-0.0053	0.0074	0.4724	--+		a	g	0.8342	-0.0293	0.0163	0.07244	--
HMGB1	rs11842871	13	31042452	G	T	73.5	26.6	1.2x10-8	1.04	BMI unadjusted	0.961538	31042452	1		t	g	0.1752	0.0005	0.0085	0.9515	--+		t	g	0.1734	-0.0054	0.0163	0.7384	-+
KL	rs576674	13	33554302	G	A	16.9	16.9	8.3x10-10	1.05	BMI unadjusted	1.05	33554302	1		a	g	0.6538	-0.0004	0.007	0.9551	--+		a	g	0.5067	0.0003	0.0124	0.9835	-+
DLEU1	rs963740	13	51096095	A	T	71.3	28.7	2.1x10-8	1.04	BMI unadjusted	0.961538	51096095	1		a	t	0.7668	0.0177	0.0077	0.02159	+++		a	t	0.7328	-0.0018	0.0128	0.8885	+-
PCDH17	rs9537803	13	58366634	C	T	27.7	27.7	4.6x10-8	1.04	BMI unadjusted	1.04	58366634	1		t	c	0.6444	-0.0052	0.0072	0.4704	+--		t	c	0.7396	0.0011	0.0131	0.9341	+-
PCDH17	rs9569864	13	58965435	C	T	82.5	17.5	8.7x10-8	1.05	BMI unadjusted	0.952381	58965435	1		t	c	0.1922	-0.0123	0.0087	0.158	-+-		t	c	0.119	-0.0478	0.0207	0.02102	-+
SRGAP2D	rs9563615	13	59077406	A	T	71	29	6.4x10-11	1.05	BMI unadjusted	0.952381	59077406	1		a	t	0.7075	0.0087	0.0071	0.2238	+++		a	t	0.6914	0.0126	0.0124	0.3084	++
SRGAP2D	rs76251711	13	59184234	G	A	1.26	1.26	2.3x10-6	1.16	BMI unadjusted	1.16	59184234	1		a	g	0.9921	-0.0041	0.0535	0.9394	--+		a	g	0.992	-0.0348	0.0831	0.6759	-+
SPRY2	rs1359790	13	80717156	G	A	72	28	2.4x10-31	1.09	BMI unadjusted	0.917431	80717156	1		a	g	0.3343	-0.0236	0.0071	0.0008405	---		a	g	0.1818	-0.0304	0.0162	0.0613	--
IRS2	rs7987740	13	109947213	T	C	60.9	39.1	4.0x10-8	1.04	BMI unadjusted	0.961538	109947213	1		t	c	0.6162	0.0136	0.0065	0.03798	-++		t	c	0.5823	-0.0034	0.0114	0.7623	+-
IRS2	rs4771648	13	110431626	G	A	66.9	33.2	8.9x10-8	1.04	BMI unadjusted	0.961538	110431626	1		a	g	0.4239	0.0109	0.0069	0.1153	+++		a	g	0.2394	-0.0093	0.0154	0.5459	-+
SLC7A7	rs17122772	14	23288935	G	C	22.8	22.8	1.6x10-8	1.04	BMI unadjusted	1.04	23288935	1		c	g	0.8657	-0.0168	0.0097	0.0837	---		c	g	0.8554	0.016	0.0189	0.3983	++
AKAP6	rs17522122	14	33302882	T	G	47.4	47.4	3.2x10-9	1.04	BMI unadjusted	1.04	33302882	1		t	g	0.3788	0.0205	0.0066	0.001987	+++		t	g	0.3489	0.0457	0.0124	0.0002322	++
CLEC14A	rs8017808	14	38848419	G	T	74.3	25.7	2.1x10-8	1.04	BMI unadjusted	0.961538	38848419	1		t	g	0.4038	-0.005	0.0071	0.4857	--+		t	g	0.2383	-0.0135	0.0135	0.3172	-+
NRXN3	rs17836088	14	79932041	C	G	21.7	21.7	6.7x10-14	1.06	BMI unadjusted	1.06	79932041	1		c	g	0.2027	0.0142	0.0079	0.0732	-++		c	g	0.1748	0.025	0.0149	0.0939	++
SMEK1	rs8010382	14	91963722	G	A	42.1	42.1	6.5x10-9	1.04	BMI unadjusted	1.04	91963722	1		a	g	0.4424	-0.0208	0.0067	0.001893	---		a	g	0.4806	-0.0082	0.0115	0.4741	--
MARK3	rs62007683	14	103894071	G	T	65.3	34.7	3.1x10-8	1.04	BMI unadjusted	0.961538	103894071	1		t	g	0.2284	0.0105	0.0084	0.2081	+++		t	g	0.2476	0.007	0.0154	0.6493	++
RASGRP1	rs8032939	15	38834033	C	T	24.6	24.6	3.5x10-14	1.06	BMI unadjusted	1.06	38834033	1		t	c	0.54	-0.0047	0.0067	0.4853	--+		t	c	0.4758	0.0008	0.0123	0.9493	-+
RASGRP1	rs34715063	15	38873115	C	T	12.4	12.4	2.3x10-19	1.1	BMI unadjusted	1.1	38873115	1		t	c	0.9262	-0.0092	0.0131	0.4824	++-		t	c	0.9209	-0.0022	0.0222	0.9209	-+
LTK	rs11070332	15	41809205	A	G	35.8	35.8	1.1x10-13	1.05	BMI unadjusted	1.05	41809205	1		a	g	0.3866	-0.0042	0.0068	0.5351	+--		a	g	0.2624	0.008	0.0136	0.557	+-
LTK	rs543786825	15	42201410	T	C	0.04	0.04	4.7x10-6	3.15	BMI unadjusted	3.15	42201410	1
ONECUT1	rs2456530	15	53091553	T	C	12.7	12.7	5.4x10-9	1.06	BMI unadjusted	1.06	53091553	1		t	c	0.2601	0.0122	0.0076	0.1084	+-+		t	c	0.341	0.0138	0.0126	0.2727	++
WDR72	rs528350911	15	53747228	G	C	0.68	0.68	2.1x10-8	1.27	BMI unadjusted	1.27	53747228	1
TCF12	rs117483894	15	57456802	G	A	3.69	3.69	3.9x10-8	1.1	BMI unadjusted	1.1	57456802	1		a	g	0.7439	-0.0283	0.0105	0.007003	---		a	g	0.9783	-0.1023	0.0457	0.02527	--
C2CD4A/B	rs8037894	15	62394264	G	C	56.6	43.4	2.6x10-13	1.05	BMI unadjusted	0.952381	62394264	1		c	g	0.5073	-0.0053	0.0065	0.41	-+-		c	g	0.5386	-0.0156	0.0117	0.1812	--
USP3	rs7178762	15	63871292	C	T	46	46	5.4x10-10	1.04	BMI unadjusted	1.04	63871292	1		t	c	0.4792	-0.0144	0.0068	0.03563	---		t	c	0.5864	-0.0089	0.0116	0.446	--
MAP2K5	rs4776970	15	68080886	A	T	64.1	35.9	5.0x10-9	1.04	BMI unadjusted	0.961538	68080886	1		a	t	0.4276	0.0134	0.0073	0.0643	+-+		a	t	0.5141	0.0147	0.0114	0.1972	++
PTPN9	rs13737	15	75932129	G	T	75.9	24.1	5.6x10-10	1.05	BMI unadjusted	0.952381	75932129	1		t	g	0.3344	-0.0116	0.0069	0.09439	+--		t	g	0.4286	0.019	0.0117	0.1049	++
HMG20A	rs1005752	15	77818128	A	C	71.5	28.5	2.5x10-29	1.08	BMI unadjusted	0.925926	77818128	1		a	c	0.6239	0.0144	0.0069	0.03669	+++		a	c	0.595	0.0148	0.0117	0.2059	++
AP3S2	rs4932265	15	90423293	T	C	26.7	26.7	4.2x10-20	1.07	BMI unadjusted	1.07	90423293	1		t	c	0.2066	0.0014	0.0082	0.8642	--+		t	c	0.2338	0.0162	0.0135	0.2297	++
PRC1	rs12910825	15	91511260	G	A	36.1	36.1	1.6x10-15	1.05	BMI unadjusted	1.05	91511260	1
ITFG3	rs6600191	16	295795	T	C	82.5	17.5	9.3x10-13	1.06	BMI unadjusted	0.943396	295795	1
CLUAP1	rs3751837	16	3583173	T	C	22	22	1.4x10-8	1.04	BMI unadjusted	1.04	3583173	1		t	c	0.1894	0.0154	0.008	0.05449	+++		t	c	0.2385	-0.0167	0.0132	0.2074	--
ATP2A1	rs8046545	16	28915217	G	A	35.9	35.9	1.9x10-8	1.04	BMI unadjusted	1.04	28915217	1		a	g	0.5932	-0.0295	0.0075	8.37e-05	-+-		a	g	0.7425	-0.0041	0.0165	0.8018	-+
FAM57B	rs11642430	16	30045789	G	C	39.9	39.9	2.2x10-9	1.04	BMI unadjusted	1.04	30045789	1		c	g	0.691	-0.008	0.0071	0.2595	--+		c	g	0.7083	0.0061	0.0134	0.6502	-+
FAM57B	rs199795270	16	30419384	C	G	0.65	0.65	1.2x10-6	1.25	BMI unadjusted	1.25	30419384	1
FTO	rs4281707	16	53501946	G	A	54.4	45.6	3.2x10-10	1.04	BMI unadjusted	0.961538	53501946	1		a	g	0.3892	-0.0019	0.0073	0.7969	+--		a	g	0.5548	0.0053	0.0115	0.6453	-+
FTO	rs78020297	16	53758720	A	G	5.17	5.17	6.5x10-9	1.09	BMI unadjusted	1.09	53758720	1
FTO	rs1421085	16	53800954	C	T	41.5	41.5	3.1x10-84	1.13	BMI unadjusted	1.13	53800954	1		t	c	0.7261	-0.0375	0.0078	1.61e-06	-+-		t	c	0.7053	-0.0534	0.0138	0.0001058	--
NFAT5	rs862320	16	69651866	C	T	57.8	42.2	3.9x10-11	1.04	BMI unadjusted	0.961538	69651866	1		t	c	0.3367	-0.018	0.007	0.01019	-+-		t	c	0.2953	-0.0114	0.0129	0.3797	-+
BCAR1	rs72802342	16	75234872	C	A	92.3	7.69	4.0x10-32	1.17	BMI unadjusted	0.854701	75234872	1
BCAR1	rs3115960	16	75516534	G	C	37	37	2.8x10-6	1.03	BMI unadjusted	1.03	75516534	1		c	g	0.6256	-0.0074	0.0075	0.3193	---		c	g	0.4191	-0.0009	0.0122	0.9433	-+
CMIP	rs2925979	16	81534790	T	C	30	30	1.4x10-14	1.05	BMI unadjusted	1.05	81534790	1		t	c	0.2401	0.0171	0.0078	0.02712	+++		t	c	0.3137	0.0013	0.0121	0.9163	+-
SPG7	rs12920022	16	89564055	A	T	15.8	15.8	3.4x10-9	1.05	BMI unadjusted	1.05	89564055	1		a	t	0.1439	0.0172	0.01	0.08708	+++		a	t	0.1945	0.0183	0.0145	0.2093	++
ZZEF1	rs1043246	17	3828086	G	C	15.7	15.7	7.9x10-7	1.05	BMI unadjusted	1.05	3828086	1
ZZEF1	rs3826482	17	3860356	A	T	57.6	42.4	2.1x10-7	1.03	BMI unadjusted	0.970874	3860356	1		a	t	0.5345	0.0031	0.0065	0.632	--+		a	t	0.4181	0.0118	0.0117	0.3142	++
ZZEF1	rs1377807	17	4045440	C	G	31.2	31.2	4.2x10-13	1.05	BMI unadjusted	1.05	4045440	1		c	g	0.2875	0.0115	0.0073	0.1169	+++		c	g	0.3574	0.0148	0.0118	0.2066	-+
ATP1B2	rs1641523	17	7549681	C	T	42.8	42.8	1.2x10-10	1.05	BMI adjusted	1.05	7549681	1		t	c	0.5828	0.0057	0.0067	0.3942	+++		t	c	0.4224	0	0.0121	0.9998	+-
ATP1B2	rs62059712	17	7740170	T	C	91.8	8.16	4.9x10-6	1.07	BMI adjusted	0.934579	7740170	1
GLP2R	rs7222481	17	9785187	C	G	32.4	32.4	1.4x10-8	1.04	BMI unadjusted	1.04	9785187	1		c	g	0.235	0.0027	0.0079	0.7303	-++		c	g	0.2829	0.0025	0.0125	0.8394	-+
RAI1	rs4925109	17	17661802	A	G	31.6	31.6	2.8x10-12	1.05	BMI unadjusted	1.05	17661802	1
NF1	rs71372253	17	29413019	C	T	6.42	6.42	4.4x10-8	1.08	BMI unadjusted	1.08	29413019	1
HNF1B	rs10962	17	36046451	C	G	22.6	22.6	9.9x10-10	1.05	BMI unadjusted	1.05	36046451	1
HNF1B	rs2189301	17	36063685	G	A	87.2	12.8	6.5x10-8	1.05	BMI unadjusted	0.952381	36063685	1		a	g	0.0682	-0.0031	0.0146	0.8301	+--		a	g	0.0892	-0.0334	0.0248	0.179	--
HNF1B	rs10908278	17	36099952	T	A	48.1	48.1	6.4x10-36	1.08	BMI unadjusted	1.08	36099952	1		a	t	0.6081	-0.0063	0.0065	0.3299	---		a	t	0.5922	0.0027	0.0113	0.8123	-+
MLX	rs34855406	17	40731411	C	G	27.7	27.7	2.3x10-12	1.05	BMI unadjusted	1.05	40731411	1		c	g	0.188	0.018	0.0091	0.04814	+++		c	g	0.1992	0.0206	0.0175	0.2383	+-
TTLL6	rs35895680	17	47060322	C	A	67.8	32.2	2.5x10-15	1.06	BMI unadjusted	0.943396	47060322	1		a	c	0.29	-0.0109	0.0073	0.1361	-++		a	c	0.2236	-0.0223	0.0148	0.1303	--
KIF2B	rs569511541	17	52140805	G	A	0.02	0.02	1.5x10-8	7.63	BMI unadjusted	7.63	52140805	1
ACE	rs2727301	17	61965043	T	C	75.4	24.6	1.3x10-6	1.04	BMI unadjusted	0.961538	61965043	1		t	c	0.8754	0.01	0.0112	0.371	++-		t	c	0.8422	0.0527	0.0212	0.013	++
ACE	rs60276348	17	62203304	T	C	14	14	2.6x10-8	1.05	BMI unadjusted	1.05	62203304	1		t	c	0.3248	0.0122	0.0111	0.2723	+++		t	c	0.6253	0.0168	0.0153	0.2714	++
BPTF	rs11657492	17	65648427	G	T	10	10	5.6x10-8	1.06	BMI unadjusted	1.06	65648427	1
BPTF	rs558308082	17	65820153	C	G	0.08	0.08	6.6x10-6	2.04	BMI unadjusted	2.04	65820153	1
BPTF	rs61676547	17	65892507	C	G	19.2	19.2	2.9x10-11	1.06	BMI unadjusted	1.06	65892507	1		c	g	0.3631	0.0142	0.0074	0.05334	+++		c	g	0.4981	0.017	0.0126	0.1755	++
LAMA1	rs7240767	18	7070642	C	T	37.6	37.6	1.6x10-8	1.04	BMI unadjusted	1.04	7070642	1		t	c	0.4186	-0.018	0.0067	0.00747	-+-		t	c	0.4067	-0.0255	0.0123	0.0377	--
COMMD9	rs62080313	18	36278709	C	T	12.3	12.3	1.0x10-8	1.06	BMI unadjusted	1.06	36278709	1		t	c	0.8898	-0.0049	0.0105	0.6397	+--		t	c	0.8612	0.0168	0.0164	0.306	-+
TCF4	rs76197067	18	52604955	G	A	0.05	0.05	8.1x10-6	2.68	BMI unadjusted	2.68	52604955	1		a	g	0.9385	-0.0033	0.0256	0.897	?--		a	g	0.9253	0.0358	0.0266	0.1772	?+
TCF4	rs72926932	18	53050646	C	A	8.39	8.39	1.0x10-14	1.09	BMI unadjusted	1.09	53050646	1		a	c	0.9437	-0.0294	0.0171	0.0857	---		a	c	0.937	-0.0572	0.0308	0.06347	--
TCF4	rs28719468	18	53452144	C	T	15.9	15.9	1.9x10-6	1.04	BMI unadjusted	1.04	53452144	1		t	c	0.79	-0.0123	0.0088	0.1625	---		t	c	0.6645	-0.0086	0.0123	0.4867	--
WDR7	rs17684074	18	54675384	G	C	74	26	2.9x10-8	1.04	BMI unadjusted	0.961538	54675384	1		c	g	0.1795	-0.0033	0.0088	0.7075	---		c	g	0.2091	0.008	0.0142	0.5736	-+
GRP	rs9957145	18	56876228	G	A	82.9	17.1	8.1x10-9	1.05	BMI unadjusted	0.952381	56876228	1		a	g	0.2444	-0.0174	0.0076	0.02199	---		a	g	0.1379	-0.032	0.0165	0.05199	--
MC4R	rs523288	18	57848369	T	A	23.8	23.8	7.6x10-13	1.05	BMI unadjusted	1.05	57848369	1		a	t	0.7671	-0.0409	0.0087	2.33e-06	-+-		a	t	0.6557	-0.0149	0.012	0.2146	--
MC4R	rs74452128	18	58056566	C	A	97.6	2.37	1.0x10-9	1.15	BMI unadjusted	0.869565	58056566	1		a	c	0.1004	-0.0381	0.0189	0.04383	--+		a	c	0.1202	-0.0357	0.0207	0.08451	+-
BCL2A	rs10469140	18	60668270	G	A	48.5	48.5	6.6x10-6	1.03	BMI unadjusted	1.03	60668270	1		a	g	0.4968	-0.0004	0.0063	0.9546	+-+		a	g	0.5285	0.0008	0.0116	0.9453	-+
BCL2A	rs12454712	18	60845884	T	C	61.4	38.6	4.6x10-13	1.05	BMI unadjusted	0.952381	60845884	1
UHRF1	rs7249758	19	4948862	A	G	20.4	20.4	3.4x10-9	1.05	BMI unadjusted	1.05	4948862	1		a	g	0.1581	0.0253	0.009	0.005129	+++		a	g	0.1965	-0.0016	0.0143	0.911	+-
PTPRS	rs116953931	19	5224998	A	G	3.71	3.71	6.4x10-6	1.08	BMI unadjusted	1.08	5224998	1		a	g	0.0218	0.0085	0.0241	0.7225	-++		a	g	0.0231	-0.0002	0.0424	0.9968	-+
INSR	rs75253922	19	7240848	C	T	19.1	19.1	2.7x10-8	1.05	BMI unadjusted	1.05	7240848	1		t	c	0.8503	-0.0189	0.009	0.03592	---		t	c	0.8446	-0.0238	0.0164	0.1456	--
MAP2K7	rs4804833	19	7970635	A	G	39	39	7.7x10-13	1.05	BMI unadjusted	1.05	7970635	1
FARSA	rs755734872	19	12938471	T	C	0.05	0.05	8.3x10-6	2.37	BMI unadjusted	2.37	12938471	1
FARSA	rs3111316	19	13038415	A	G	58.9	41.2	6.3x10-13	1.05	BMI unadjusted	0.952381	13038415	1		a	g	0.514	0.0071	0.0064	0.2647	++-		a	g	0.495	0.0077	0.0114	0.4987	-+
TM6SF2	rs8107974	19	19388500	T	A	7.69	7.69	3.3x10-15	1.1	BMI unadjusted	1.1	19388500	1		a	t	0.9062	-0.0379	0.0121	0.001783	---		a	t	0.8528	-0.0167	0.0166	0.3138	+-
TM6SF2	rs188247550	19	19396616	T	C	1.95	1.95	5.2x10-6	1.15	BMI unadjusted	1.15	19396616	1
PEPD	rs10406327	19	33890838	C	G	52.3	47.7	3.8x10-8	1.04	BMI unadjusted	0.961538	33890838	1		c	g	0.6293	0.0013	0.0069	0.8541	+-+		c	g	0.4919	-0.024	0.0113	0.03369	+-
TOMM40/APOE	rs745903616	19	44938870	A	G	0.13	0.13	8.3x10-6	1.61	BMI unadjusted	1.61	44938870	1
TOMM40/APOE	rs429358	19	45411941	T	C	84.6	15.4	2.6x10-18	1.08	BMI unadjusted	0.925926	45411941	1		t	c	0.8595	0.0143	0.0092	0.1219	+++		t	c	0.8183	0.0066	0.0146	0.6528	+-
GIPR	rs10406431	19	46157019	A	G	56.3	43.8	9.6x10-14	1.05	BMI unadjusted	0.952381	46157019	1		a	g	0.5285	0.0234	0.0064	0.0002346	+++		a	g	0.5075	0.0238	0.0113	0.03553	++
GIPR	rs2238689	19	46178661	C	T	41.8	41.8	5.4x10-9	1.04	BMI unadjusted	1.04	46178661	1		t	c	0.5876	-0.0113	0.0065	0.08382	---		t	c	0.5057	-0.0118	0.0114	0.3005	--
GIPR	rs533172266	19	46351837	T	C	0.06	0.06	3.7x10-6	2.33	BMI unadjusted	2.33	46351837	1
ZC3H4	rs3810291	19	47569003	A	G	67.3	32.7	8.9x10-12	1.05	BMI unadjusted	0.952381	47569003	1		a	g	0.5165	0.0071	0.0067	0.2828	-++		a	g	0.4157	0.0091	0.0129	0.4813	-+
NKX2.2	rs13041756	20	21466795	C	T	10.7	10.7	1.4x10-8	1.06	BMI unadjusted	1.06	21466795	1		t	c	0.8081	-0.0111	0.0085	0.1908	+--		t	c	0.8901	-0.0131	0.0182	0.4707	+-
RALY	rs2268078	20	32596704	A	G	65.7	34.3	2.3x10-10	1.04	BMI unadjusted	0.961538	32596704	1		a	g	0.6787	-0.0021	0.0073	0.7744	---		a	g	0.7679	0.0125	0.0146	0.3928	++
HNF4A	rs76811102	20	42905415	T	C	4.24	4.24	1.1x10-7	1.09	BMI unadjusted	1.09	42905415	1
HNF4A	rs4810426	20	43001721	T	C	10.6	10.6	3.1x10-17	1.09	BMI unadjusted	1.09	43001721	1		t	c	0.4015	0.011	0.0082	0.181	+++		t	c	0.0832	-0.0065	0.0204	0.7503	+-
HNF4A	rs191830490	20	43023355	G	A	99.4	0.59	2.2x10-6	1.24	BMI unadjusted	0.806452	43023355	1
HNF4A	rs1800961	20	43042364	T	C	3.53	3.53	2.3x10-22	1.18	BMI unadjusted	1.18	43042364	1
HNF4A	rs11696357	20	43233649	A	G	93.4	6.6	9.9x10-6	1.06	BMI unadjusted	0.943396	43233649	1
EYA2	rs560716466	20	45317678	A	G	0.31	0.31	9.8x10-6	1.36	BMI unadjusted	1.36	45317678	1
EYA2	rs6063048	20	45598564	G	A	72.5	27.5	2.2x10-11	1.05	BMI unadjusted	0.952381	45598564	1		a	g	0.1836	-0.0047	0.0085	0.5796	--+		a	g	0.1918	-0.0166	0.0154	0.2813	--
CEBPB	rs11699802	20	48832135	C	T	53.6	46.4	1.8x10-11	1.04	BMI unadjusted	0.961538	48832135	1		t	c	0.4576	-0.021	0.0063	0.0008565	---		t	c	0.4882	-0.0353	0.0114	0.001944	--
TSHZ2	rs34454109	20	51223594	A	T	77.1	22.9	7.1x10-9	1.04	BMI unadjusted	0.961538	51223594	1		a	t	0.8349	0.0132	0.0095	0.1668	+-+		a	t	0.8277	0.0135	0.0204	0.5065	+-
GNAS	rs6070625	20	57394628	G	C	51.7	48.3	5.3x10-14	1.05	BMI unadjusted	0.952381	57394628	1		c	g	0.4651	-0.0135	0.0065	0.03631	---		c	g	0.5954	-0.0126	0.0116	0.2769	--
GNAS	rs862016	20	57551099	G	A	7.83	7.83	1.1x10-7	1.07	BMI unadjusted	1.07	57551099	1
ZBTB46	rs6011155	20	62450664	T	C	63	37	6.3x10-6	1.04	BMI adjusted	0.961538	62450664	1		t	c	0.6391	0.0068	0.0069	0.3241	+++		t	c	0.5397	0.0234	0.0113	0.03813	++
TCEA2	rs59944054	20	62693175	A	G	23.8	23.8	1.5x10-8	1.06	BMI adjusted	1.06	62693175	1		a	g	0.179	0.0057	0.0089	0.5176	+++		a	g	0.2418	-0.003	0.0132	0.8211	+-
MTMR3/ASCC2	rs6518681	22	30609554	G	A	91.4	8.64	1.1x10-12	1.09	BMI unadjusted	0.917431	30609554	1		a	g	0.0469	-0.0425	0.0175	0.01532	---		a	g	0.0581	-0.0595	0.0242	0.0138	--
YWHAH	rs117001013	22	32348841	C	T	91.2	8.83	1.7x10-8	1.07	BMI unadjusted	0.934579	32348841	1		t	c	0.0489	-0.0126	0.0178	0.4777	-++		t	c	0.051	-0.0327	0.0344	0.3422	--
EP300	rs5758223	22	41489920	A	G	71.7	28.3	3.8x10-8	1.04	BMI unadjusted	0.961538	41489920	1		a	g	0.7781	0.0084	0.0088	0.3414	-++		a	g	0.7023	-0.0043	0.0123	0.7258	+-
PNPLA3	rs738408	22	44324730	T	C	22.6	22.6	1.4x10-10	1.05	BMI unadjusted	1.05	44324730	1		t	c	0.4096	0.0383	0.0071	8.25e-08	+++		t	c	0.1963	0.0028	0.0143	0.845	+-
PIM3	rs1801645	22	50356850	C	T	27.5	27.5	1.5x10-8	1.04	BMI unadjusted	1.04	50356850	1
PIM3	rs112915006	22	50604696	G	A	5.12	5.12	9.8x10-7	1.08	BMI unadjusted	1.08	50604696	1		a	g	0.8514	-0.0199	0.0098	0.04278	++-		a	g	0.9272	-0.0155	0.0227	0.4942	--

## Sheet: Supplementary Table 2
Supplementary Table 2: List of credible SNPs for rs10992863
Position	MarkerName	Allele1	Allele2	Freq1	FreqSE	MinFreq	MaxFreq	Effect	StdErr	P-value	Direction	MAF	R2	leadSNP	postProb	CumSum
chr9:96445803	9:96445803_G/A_Intergenic	a	g	0.1691	0.0935	0.0524	0.2705	-0.0554	0.01	3.21e-08	---	0.2276	1	rs10992863	0.338862	0.338862
chr9:96415368	9:96415368_G/A_Intron:PHF2	a	g	0.1731	0.0809	0.0983	0.2715	-0.0514	0.0093	3.75e-08	---	0.2286	0.9609	rs10992863	0.294688	0.63355
chr9:96442385	9:96442385_G/C_Intergenic	c	g	0.1153	0.0617	0.0337	0.1828	-0.0591	0.0116	3.81e-07	---	0.16	0.6465	rs10992863	0.0366411	0.670191
chr9:96443554	9:96443554_C/T_Intergenic	t	c	0.1155	0.0619	0.0337	0.183	-0.0585	0.0116	4.81e-07	---	0.16	0.6465	rs10992863	0.0282152	0.698406
chr9:96443852	9:96443852_G/A_Intergenic	a	g	0.1153	0.0617	0.0339	0.1828	-0.0581	0.0116	5.65e-07	---	0.16	0.6465	rs10992863	0.0237394	0.722146
chr9:96439487	9:96439487_C/T_Intron:PHF2	t	c	0.1164	0.057	0.0671	0.1845	-0.0549	0.0111	7.32e-07	---	0.162	0.6354	rs10992863	0.0167059	0.738852
chr9:96440051	9:96440051_C/A_Utr3:PHF2	a	c	0.1164	0.0568	0.0673	0.1842	-0.0546	0.0111	8.04e-07	---	0.162	0.6354	rs10992863	0.0146269	0.753479
chr9:96431674	9:96431674_G/A_Intron:PHF2	a	g	0.1162	0.0567	0.0673	0.184	-0.0545	0.0111	8.61e-07	---	0.161	0.6306	rs10992863	0.0139954	0.767474
chr9:96428243	9:96428243_C/T_Intron:PHF2	t	c	0.1163	0.0566	0.0673	0.184	-0.0544	0.0111	8.75e-07	---	0.161	0.6306	rs10992863	0.0133922	0.780866
chr9:96430442	9:96430442_A/T_Intron:PHF2	a	t	0.8838	0.0567	0.816	0.9327	0.0544	0.0111	8.89e-07	+++	0.161	0.6306	rs10992863	0.0133922	0.794258
chr9:96431350	9:96431350_G/A_Intron:PHF2	a	g	0.1162	0.0567	0.0673	0.184	-0.0544	0.0111	8.89e-07	---	0.161	0.6306	rs10992863	0.0133922	0.80765
chr9:96432133	9:96432133_C/G_Intron:PHF2	c	g	0.8838	0.0567	0.816	0.9327	0.0544	0.0111	8.89e-07	+++	0.161	0.6306	rs10992863	0.0133922	0.821042
chr9:96441750	9:96441750_C/T_Utr3:PHF2	t	c	0.1168	0.0619	0.0251	0.1833	-0.0572	0.0117	1.05e-06	---	0.161	0.6409	rs10992863	0.0132562	0.834299
chr9:96443483	9:96443483_C/T_Intergenic	t	c	0.1704	0.0777	0.0813	0.2678	-0.0468	0.0095	8.67e-07	---	0.174	0.5742	rs10992863	0.0131164	0.847415
chr9:96446472	9:96446472_TAAAC/T_Intergenic	t	taaac	0.1156	0.0626	0.0363	0.184	-0.0567	0.0116	9.93e-07	---	0.16	0.6465	rs10992863	0.0130911	0.860506
chr9:96396218	9:96396218_G/T_Intron:PHF2	t	g	0.1872	0.0778	0.1073	0.2827	-0.0444	0.009	6.87e-07	---	0.2545	0.8235	rs10992863	0.0129001	0.873406
chr9:96430415	9:96430415_A/G_Intron:PHF2	a	g	0.8825	0.062	0.816	0.9761	0.0571	0.0117	1.08e-06	+++	0.16	0.6361	rs10992863	0.012716	0.886122
chr9:96445296	9:96445296_C/T_Intergenic	t	c	0.1166	0.0628	0.0251	0.1835	-0.0572	0.0118	1.13e-06	---	0.159	0.6417	rs10992863	0.0109272	0.897049
chr9:96423608	9:96423608_G/A_Intron:PHF2	a	g	0.1163	0.0566	0.0673	0.184	-0.0536	0.0111	1.28e-06	---	0.162	0.6252	rs10992863	0.00944159	0.906491
chr9:96440728	9:96440728_C/T_Utr3:PHF2	t	c	0.1163	0.057	0.067	0.1842	-0.0536	0.0111	1.33e-06	---	0.162	0.6354	rs10992863	0.00944159	0.915933
chr9:96444789	9:96444789_G/T_Intergenic	t	g	0.1132	0.0615	0.0332	0.1795	-0.0567	0.0118	1.48e-06	---	0.1501	0.5992	rs10992863	0.00891255	0.924845
chr9:96425001	9:96425001_A/AATGG_Insertion:PHF2	a	aatgg	0.8742	0.05	0.8148	0.9278	0.0502	0.0104	1.48e-06	+++	0.164	0.6145	rs10992863	0.00880534	0.933651
chr9:96386899	9:96386899_AGAT/A_Deletion:PHF2	a	agat	0.1222	0.0516	0.0676	0.1837	-0.051	0.0106	1.57e-06	---	0.162	0.615	rs10992863	0.00831581	0.941966
chr9:96447802	9:96447802_A/C_Intergenic	a	c	0.8827	0.0632	0.8155	0.9747	0.0556	0.0117	2.11e-06	+++	0.16	0.6465	rs10992863	0.00687229	0.948839
chr9:96446717	9:96446717_G/A_Intergenic	a	g	0.1161	0.0628	0.0337	0.1842	-0.0549	0.0116	2.33e-06	---	0.16	0.6465	rs10992863	0.00622146	0.95506
chr9:96395682	9:96395682_G/A_Intron:PHF2	a	g	0.1171	0.0613	0.0239	0.183	-0.0553	0.0117	2.41e-06	---	0.161	0.6306	rs10992863	0.00608843	0.961149
chr9:96384551	9:96384551_T/C_Intron:PHF2	t	c	0.8778	0.0516	0.8165	0.9325	0.0503	0.0106	2.24e-06	+++	0.162	0.615	rs10992863	0.00607082	0.967219
chr9:96453968	9:96453968_T/C_Intergenic	t	c	0.8826	0.0633	0.8153	0.974	0.0549	0.0117	2.77e-06	+++	0.16	0.6465	rs10992863	0.00518585	0.972405
chr9:96453814	9:96453814_C/T_Intergenic	t	c	0.1163	0.063	0.0349	0.1847	-0.0544	0.0116	2.74e-06	---	0.16	0.6465	rs10992863	0.00508155	0.977487
chr9:96392815	9:96392815_T/C_Intron:PHF2	t	c	0.7978	0.0787	0.7183	0.8911	0.0404	0.0087	3.58e-06	+++	0.2545	0.8235	rs10992863	0.00312868	0.980615
chr9:96392439	9:96392439_G/A_Intron:PHF2	a	g	0.1401	0.0548	0.0713	0.1845	-0.0453	0.0101	7.09e-06	---	0.163	0.6097	rs10992863	0.00175186	0.982367
chr9:96913380	9:96913380_G/A_Intergenic	a	g	0.2416	0.0883	0.1457	0.3507	-0.0365	0.0081	7.21e-06	---	0.2942	0.0288	rs10992863	0.00155884	0.983926
chr9:96394346	9:96394346_A/C_Intron:PHF2	a	c	0.871	0.0505	0.8163	0.9291	0.0455	0.0104	1.17e-05	+++	0.163	0.6198	rs10992863	0.00110703	0.985033
chr9:96413594	9:96413594_C/T_Intron:PHF2	t	c	0.0731	0.0416	0.0122	0.1139	-0.0646	0.0151	1.92e-05	---	0.0755	0.2773	rs10992863	0.00102837	0.986062
chr9:96424850	9:96424850_A/G_Intron:PHF2	a	g	0.7637	0.037	0.7202	0.7978	0.0335	0.0076	9.99e-06	+++	0.2386	0.9086	rs10992863	0.0009464	0.987008
chr9:96417617	9:96417617_T/G_Intron:PHF2	t	g	0.8784	0.052	0.8155	0.9309	0.0463	0.0107	1.45e-05	+++	0.162	0.6252	rs10992863	0.00092379	0.987932
chr9:96424849	9:96424849_GA/G_Deletion:PHF2	g	ga	0.2365	0.0371	0.2021	0.2798	-0.0333	0.0076	1.16e-05	---	0.2386	0.9086	rs10992863	0.00084318	0.988775
chr9:96398363	9:96398363_G/T_Intron:PHF2	t	g	0.1254	0.051	0.0696	0.1845	-0.0452	0.0105	1.75e-05	---	0.161	0.6306	rs10992863	0.00082427	0.989599

## Sheet: Supplementary Table 3
Supplementary Table 3:Association of rs10992863 (lead T2D SNP) and rs9650755 (lead BMI SNP) with BMI in the UK BioBank and T2D ProDiGY with conditional analyses
SNP	UK Biobank BMI		UK Biobank BMI after conditional analyses*		ProDiGY T2D		ProDiGY T2D after conditional analyses*
	Estimate	P value	Estimate	P value	Estimate	P value	Estimate	P value
rs10992863	0.062	5.1 × 10-7	0.03	2.5 × 10-2	0.554	3.2 × 10-8	0.319	4.4 × 10-8
rs9650755	0.01	9.8 × 10-16	0.09	1.9 × 10-11	0.016	2.9 × 10-2	0.046	0.34
*Association with BMI in UK Biobank, conditioning on the other SNP
**Association with T2D in ProDiGY, conditioning on the other SNP
